# Supplementary material for: Altered Gut Microbiota Profiles in Sows and Neonatal Piglets Associated with Porcine Epidemic Diarrhea Virus Infection
Source: PubMed Central journal article supplement (PMC5727058; doi:10.1038/s41598-017-17830-z), 2017-12-12

1 **Altered Gut Microbiota Profiles in Sows and Neonatal Piglets Associated with Porcine**  
2 **Epidemic Diarrhea Virus Infection**

3

4 **Running title: Altered Gut Microbiota Profiles to PEDV Infection**

5

6 Deping Song<sup>1,2</sup>, Qi Peng<sup>1,2</sup>, Yanjun Chen<sup>1,2</sup>, Xinrong Zhou<sup>1,2</sup>, Fanfan Zhang<sup>1,2</sup>, Anqi Li<sup>1,2</sup>,  
7 Dongyan Huang<sup>1,2</sup>, Qiong Wu<sup>1,2</sup>, Yu Ye<sup>1,2</sup>, Houjun He<sup>1,2</sup>, Leyi Wang<sup>3\*</sup>, Yuxin Tang<sup>1,2\*</sup>

8

9 <sup>1</sup> Key Laboratory for Animal Health of Jiangxi Province, Nanchang, Jiangxi, 330045, China

10 <sup>2</sup> Department of Preventive Veterinary Medicine, College of Animal Science and Technology,  
11 Jiangxi Agricultural University, Nanchang, Jiangxi, 330045, China

12 <sup>3</sup> Department of Veterinary Clinical Medicine and the Veterinary Diagnostic Laboratory,  
13 College of Veterinary Medicine, University of Illinois, Urbana, IL, 61802, United States of  
14 America.

15

16

17 \* Corresponding authors

18 E-mail: [tang53ster@gmail.com](mailto:tang53ster@gmail.com) (YT), [leyiwang@illinois.edu](mailto:leyiwang@illinois.edu) (LW)

19

20

21 **Appendix 1. Experimental Procedures**

22 **Detailed information of clinical samples.**

23 Sows were puerperal Yorkshire-Landrace crossbred and then were cross-bred with Duroc boar,  
24 delivering Yorkshire-Landrace-Duroc crossbred commercial pigs. From October 2012 to  
25 March 2014, the farm has experienced at least thrice outbreaks of severe diarrhea in suckling  
26 piglets within 10 days, as well as temporary diarrhea in sows and finishing pigs. Suckling  
27 piglets suffered diarrhea characterized with profuse watery diarrhea, vomiting, dehydration and  
28 mortality over 80%. About 300 diarrheal samples from the farm were examined by an  
29 established RT-PCR method in our lab, and 70% of these samples were identified as PEDV  
30 positive infection, resembling the disease caused by variant PEDV (data not shown). Based on  
31 the healthy status and age, samples were classified into six groups: (1) Sows without diarrhea  
32 during pregnancy and lactation and without detectable PEDV in feces were selected as healthy  
33 sows (HS), (2) sows without diarrhea during pregnancy and lactation, but the labors exhibited  
34 diarrhea less than 7 days were selected as asymptomatic sows (AP), (3) sows with diarrhea  
35 within a month until sampling were set as diarrheal sows (DS), (4) piglets aged in five days  
36 born from healthy sows and without diarrhea and detectable PEDV in feces were set as healthy  
37 piglets (HP), (5) piglets under the age of 10-day born from asymptomatic and diarrheal sows  
38 and without observation of diarrhea were set as asymptomatic piglets (AP), and (6) diarrheal  
39 piglets within 10-day old born from AS and DS were set as diarrheal piglets (DP).

#### 40 **Mock bacterial community (MC).**

41 The bacteria for the mock community (MC) contained a variety of microorganisms isolated  
42 and identified by our lab. Most of the bacteria were isolated from pigs, including probiotics  
43 and pathogens. All of the MC bacteria have been identified by chemistry methods and Sanger  
44 sequencing on 16S rRNA (small subunit of the ribosome in bacteria), amplified by the universal

45 primer 8F/1492R (8F: 5'-AGAGTTTGATCCTGGCTCAG-3', 1492R: 5'-  
46 GGTTACCTTGTTACGACTT-3'). The bacteria included were *Bacillus natto*, *Bacillus subtilis*,  
47 *Bacillus licheniformis*, *Bacillus cereus*, *Clostridium perfringens*, *Lactococcus lactis*,  
48 *Lactobacillus rhamnosus* GG, *Staphylococcus aureus*, *Erysipelothrix rhusiopathiae*,  
49 *Haemophilus parasuis*, *Staphylococcus .sp*, *Proteus mirabilis*, *Enteropathogenic E.coli*,  
50 *Pseudomonas aeruginosa*, *Microbacterium lacticum*, *Trueperella pyogenes*. Genomic DNA of  
51 each bacterial strain was extracted and then quantified using NanoDrop 2000 UV  
52 spectrophotometer (NanoDrop Technologies, USA). DNAs of each bacterium were equimolar  
53 pooled to create MC. Each of the DNAs from MC was quantified by a SYBR Green  
54 quantitative RT-PCR (qRT-PCR) based on amplification of the 16S rRNA gene copy number.  
55 The universal primers 357F/519R (357F: 5'-CTCCTACGGGAGGCAGCAG-3', 519R: 5'-  
56 GWATTACCGCGGCKGCTG-3') were used, and the qRT-PCR was performed by the method  
57 described previously<sup>1</sup>.

#### 58 **Sequencing consistency of MC.**

59 To evaluate the primers for MiSeq sequencing and analytic workflows, a 'mock' community  
60 (MC) was constructed by 15 bacterial species belong to three phyla: *Firmicutes*, *Proteobacteria*,  
61 and *Actinobacteria* (Table S1a). The equimolar pooled MC DNA was amplified and sequenced  
62 by a MiSeq PE300 run together with that of clinical samples. Sequences were obtained by base-  
63 calling, filtered, and resulted in 52,516 clean reads. Reads were processed using package  
64 QIIME v 1.9.0, and 47,512 of the clean reads were generated into OTUs, and then OTUs were  
65 filtered based on the cutoff of <0.005% in abundance. Firstly, we examined the observed  
66 taxonomy consistency of reads from MiSeq run to the pooled MC. At phylum level, 99.27% of

67 the non-chimeric reads were assigned, and all belonged to *Firmicutes* (N=39,423),  
68 *Proteobacteria* (N=5,981), and *Actinobacteria* (N=1,760), only 330 reads were assigned to  
69 other three phyla (*TM7*, N=44; *Tenericutes*, N=163; *Spirochaetes*, N=23) and 118 reads were  
70 not assigned to any bacteria; at the genus level, 93.50% (N=44,422) of the assigned reads  
71 (N=47,512) were targeting 31 genera, with 6.50% of the OTUs were unclassified and/or others.  
72 Of the 31 genus generated, the 13 genus for the pooled DNAs of MC occupied 98.78% of the  
73 assigned reads (N=43,880), and the plus 542 assigned reads were targeting other 18 genera  
74 (Table S1b).

75 Secondly, we explored the consistence of relative abundance of each community member  
76 between the results of MiSeq sequencing and qPCR. We sought to establish the quantitative  
77 PCR (qPCR) to quantify the accurate community compositions of the MC, and to observe the  
78 consistency between qPCR and next generation sequencing (NGS) methods. There were  
79 differences in the relative abundance of the MC bacteria between the two methods: *Clostridium*  
80 *perfringens*, *Lactococcus lactis*, *Erysipelothrix rhusiopathiae*, *Haemophilus parasuis*, *Proteus*  
81 *mirabilis*, *Enteropathogenic E.coli*, *Pseudomonas aeruginosa*, and *Trueperella pyogenes* were  
82 overrepresented in NGS sequences (varied from 1.01 ~ 1.46 fold), while *Bacillus*,  
83 *Lactobacillus rhamnosus GG*, *Staphylococcus aureus*, *Staphylococcus .sp*, and  
84 *Microbacterium lacticum* were underrepresented (varied from 0.23 ~ 0.81 fold) (Table S1b).  
85 Taken overall MC into consideration, the MiSeq results were mostly consistent with the results  
86 from qPCR, the ratio of NGS abundance and qPCR was 0.99. In general, the primer (27F/534R)  
87 was proved accurately to amplify the 16S rDNA to represent the microflora and the  
88 methodology used in this study was appropriate for unveiling the microbial communities in

89 clinical samples.

## 90 **Data processing and bioinformatics analysis.**

91 The average quality score of the raw data was analyzed and evaluated by FastQC version 0.11.2  
92 released (<http://www.bioinformatics.babraham.ac.uk/>)<sup>2</sup>. Adapters and nucleotides with quality  
93 <Q20 were cut by Cutadapt software<sup>3</sup>. Reads without barcode and/or primer sequence was  
94 removed. Furthermore, reads with three consecutive low quality base calls, with <75% high  
95 quality base calls and length, and reads with one or more N base were removed. The forward  
96 and reverse MiSeq pair-end reads were merged to assemble the V1~V3 contigs by FLASH  
97 program<sup>4</sup>, samples were split according to the barcode sequences used in the primers of each  
98 sample, and primer and barcode sequences in 5'/3' end of each read was truncated. Reads were  
99 then subjected to package Quantitative Insights Into Microbial Ecology (QIIME) v1.9.0 for the  
100 following analyses: Chimeras were checked and filtered to create clean reads by using Usearch  
101 algorithm (v 6.1) with default settings<sup>5, 6</sup>. Operational taxonomic units (OTUs) were generated  
102 with the pick\_open\_reference\_otus.py script against Greengenes database 2013-08 release with  
103 a threshold of 97% similarity by using PyNAST<sup>7, 8</sup>. OTUs were picked by PyNAST method  
104 using the algorithm of selecting the longest sequence among identical reads, and abundance of  
105 each OTU in the initial sequences was recaptured by counting the number or proportion of the  
106 identical reads. The most abundant member of each OTU was selected as the representative  
107 sequence of that OTU. OTU representative sequences were assigned to Greengenes database  
108 on taxonomic levels from phylum to genus, and even to species level, and then annotated by  
109 Ribosomal Project naive Bayesian classifier (v2.2, [rdp.cme.msu.edu](http://rdp.cme.msu.edu), release 10.4) at a 80%  
110 similarity threshold<sup>9</sup>. Taxonomic levels from phylum to species of each sample was generated

111 into a collection of tables by MEGAN4 software (<http://ab.inf.uni-tuebingen.de/software/megan/>), and rep\_set.tree was constructed by species abundance and  
112 microbial community structure<sup>10</sup>. To explore OTUs/taxonomy that were ubiquitously present  
113 among samples, Venny (v2.0), an interactive online tool  
114 (<http://bioinfogp.cnb.csic.es/tools/venny/index.html>) was used.

116 To avoid the bias that may be introduced by sequencing depth for each sample, reads were  
117 normalized to 15,400 reads for each sample (we chose 15,400 as the highest sequence because  
118 the smallest non-chimeric reads in the subsamples is 15,400) with the single\_rarefaction.py  
119 script within QIIME before being used for alpha and beta diversity analyses. Alpha diversity  
120 analysis was performed with QIIME scripts alpha\_rarefaction.py and alpha\_diversity.py. The  
121 dynamic of richness, diversity and evenness in microbiota of pigs was represented by indices  
122 of Shannon<sup>11</sup>, Chao 1<sup>12</sup>, observed species, and Simpson<sup>13</sup>. The R packages ggplot2 and igraph  
123 were used to draw figures on boxplot of alpha diversity indices and bacterial abundances.

124 Weighted and unweighted UniFrac distances were computed for beta diversity comparisons  
125 with QIIME script of beta\_diversity\_through\_plots.py<sup>14</sup>. UniFrac distance metrics was used  
126 for PCoA and UPGMA to constructed phylogenetic trees visualized by FigTree v1.4.2<sup>15-17</sup>.  
127 Script make\_2d\_plots.py was used to generate 2-dimensional (2D) PCoA.

## 128 **Data submission**

129 The 16S rRNA sequences described in this study were deposited at Sequence Read Archive  
130 (SRA) database belongs to National Center for Biotechnology Infromation (NCBI) under the  
131 BioProject PRJNA401527 and NCBI BioSample SAMN07626583.

## 132 **References:**

- 133 1. Turner, S., Pryer, K.M., Miao, V.P.W., and Palmer, J.D. 1999. Investigating deep  
134 phylogenetic relationships among cyanobacteria and plastids by small subunit rRNA sequence  
135 analysis. *Journal of Eukaryotic Microbiology* 46: 327–338.
- 136 2. Schmieder, R. & Edwards, R. Quality control and preprocessing of metagenomic datasets.  
137 *Bioinformatics* 27, 863-864, doi:10.1093/bioinformatics/btr026 (2011).
- 138 3. Martin, M. Cutadapt removes adapter sequences from high-throughput sequencing reads.  
139 *EMBnet. journal* 17, pp. 10-12 (2011).
- 140 4. Magoc, T. & Salzberg, S. L. FLASH: fast length adjustment of short reads to improve  
141 genome assemblies. *Bioinformatics* 27, 2957-2963 (2011).
- 142 5. Caporaso, J. G. *et al.* QIIME allows analysis of high-throughput community sequencing data.  
143 *Nature methods* 7, 335-336, doi:10.1038/nmeth.f.303 (2010).
- 144 6. Kuczynski, J. *et al.* Using QIIME to analyze 16S rRNA gene sequences from microbial  
145 communities. *Current protocols in microbiology*, 1E. 5.1-1E. 5.20 (2012).
- 146 7. DeSantis, T. Z. *et al.* Greengenes, a chimera-checked 16S rRNA gene database and  
147 workbench compatible with ARB. *Applied and environmental microbiology* 72, 5069-5072,  
148 doi:10.1128/AEM.03006-05 (2006).
- 149 8. Caporaso, J. G. *et al.* PyNAST: a flexible tool for aligning sequences to a template alignment.  
150 *Bioinformatics* 26, 266-267 (2010).
- 151 9. Wang, Q., Garrity, G. M., Tiedje, J. M. & Cole, J. R. Naive Bayesian classifier for rapid  
152 assignment of rRNA sequences into the new bacterial taxonomy. *Applied and environmental*  
153 *microbiology* 73, 5261-5267, doi:10.1128/AEM.00062-07 (2007).
- 154 10. Huson, D. H., Mitra, S., Ruscheweyh, H. J., Weber, N. & Schuster, S. C. Integrative analysis  
155 of environmental sequences using MEGAN4. *Genome research* 21, 1552-1560,  
156 doi:10.1101/gr.120618.111 (2011).
- 157 11. Shannon, C. E. The mathematical theory of communication. 1963. *M.D. computing :*  
158 *computers in medical practice* 14, 306-317 (1997).
- 159 12. Chao, A. Nonparametric estimation of the number of classes in a population. *Scandinavian*  
160 *Journal of statistics*, 265-270 (1984).
- 161 13. Hunter, P. R. & Gaston, M. A. Numerical index of the discriminatory ability of typing  
162 systems: an application of Simpson's index of diversity. *Journal of clinical microbiology* 26,

163 2465-2466 (1988).

164 14. Lozupone, C. A., Hamady, M., Kelley, S. T. & Knight, R. Quantitative and qualitative  $\beta$   
165 diversity measures lead to different insights into factors that structure microbial communities.  
166 *Applied and environmental microbiology* **73**, 1576-1585 (2007).

167 15. Hamady, M., Lozupone, C. & Knight, R. Fast UniFrac: facilitating high-throughput  
168 phylogenetic analyses of microbial communities including analysis of pyrosequencing and  
169 PhyloChip data. *The ISME journal* **4**, 17-27 (2010).

170 16. Lozupone, C., Lladser, M. E., Knights, D., Stombaugh, J. & Knight, R. UniFrac: an  
171 effective distance metric for microbial community comparison. *The ISME journal* **5**, 169  
172 (2011).

173 17. Lozupone, C. & Knight, R. UniFrac: a new phylogenetic method for comparing microbial  
174 communities. *Applied and environmental microbiology* **71**, 8228-8235 (2005).

175



176 **Supplementary Tables and Figures**

177 **Table S1. Background information and quantification of the MC used in this study.** Each  
178 of the bacteria used was examined by chemistry test and sequenced the 16S rRNA by universal  
179 primers 8F and 1492R. a) Taxonomy of each bacterium from phylum to genus was annotated.  
180 500 ng from each mock bacterium was pooled to create MC. b) Sequences were filtered to  
181 obtain clean reads and then were assigned to Greengenes database to generate OTUs. DNA  
182 concentration of each mock bacterium was quantitated by the qPCR assay by primer  
183 357F/519R, and then the proportion of each mock bacterium was calculated based on the results  
184 from qPCR and MiSeq sequencing, respectively. The ratio of qPCR/MiSeq were then  
185 calculated to analyze the consistence of these two methods.

186 **Table S2. Summary of study samples and fecal bacteria 16S rRNA amplicon sequence**  
187 **datasets.**

188 **Table S3. Statistics of alpha diversity indices in all clinical samples.** The indices of Shannon,  
189 Chao1, Good's coverage, Observed species, and Simpson were introduced to describe alpha  
190 diversity of data in all clinic samples.

191 **Table S4. Comparison of bacteria abundance between HS and HP at phylum**  
192 **and genus level**

193 **Table S5. The bacterial abundance at the phylum level were comparison by ANOVA**  
194 **among the sow (a) and piglet (b) groups.**

195 **Table S6. Relative differences in microbial taxa abundance in different groups.** (a) HS, AS  
196 and DS; (b) HS and DS; (c) HS and DS; (d) AS and DS; (e) HP, AP and DP; (f) HP and AP; (g)  
197 HP and DP; (h) AP and DP.

198 **Fig. S1. Rarefaction curves of the clinic sequencing data under the condition of 0.97**  
199 **similarity.** The observed species of each sample was in plateaued saturation phase over 5,000  
200 reads.

201 **Fig. S2. The unweighted pair group method with arithmetic mean (UPGMA) tree showing**  
202 **relationships among samples of sow (A) and piglet (B) according to bacterial profile.**

203 **Fig. S3. Histogram of the LDA scores computed for features differentially abundant**  
204 **among healthy, asymptomatic and diarrheal sows. (A) HS (colored in green) vs. DS (red);**  
205 **(B) HS (green) vs. AS (red); (C) AS (red) vs. DS (green).**

206 **Fig. S4. Histogram of the LDA scores computed for features differentially abundant**  
207 **among healthy, asymptomatic and diarrheal piglets. (A) HP (colored in green) vs. AP (red);**  
208 **(B) HP (green) vs. DP (red); (C) AP (red) vs. DP (green).**

209

**Table S1. Background information and quantification of the MC used in this study.** Each of the bacteria used was identified by chemistry test and sequenced the 16S rRNA by universal primers 8F and 1492R. a) Taxonomy of each bacteria from phylum to genus was annotated. 500 ng from each mock bacteria was pooled to create MC. b) Sequences were filtered to obtain clean reads and then were assigned to Greengenes database to generate OTUs. DNA concentration of each mock bacteria was quantified by the qPCR assay by primer 357F/519R, and then the proportion of each mock bacteria was calculated based on the results from qPCR and MiSeq sequencing, respectively. And then the ratio of qPCR/MiSeq were calculated to analyze the consistence of these two methods.

a. Taxonomy of MC

| Bacterial species                   | Taxon                 |                             |                           |                            |                       | Pooled genomic DNAs |                    |                          |
|-------------------------------------|-----------------------|-----------------------------|---------------------------|----------------------------|-----------------------|---------------------|--------------------|--------------------------|
|                                     | Phylum                | Class                       | Order                     | Family                     | Genus                 | DNA Conc. (ng/μl)   | Volumes mixed (μl) | pooled DNA quantity (ng) |
| <i>Bacillus natto</i>               | <i>Firmicutes</i>     | <i>Bacilli</i>              | <i>Bacillales</i>         | <i>Bacillaceae</i>         | <i>Bacillus</i>       | 99.30               | 5.04               | 500.00                   |
| <i>Bacillus subtilis</i>            | <i>Firmicutes</i>     | <i>Bacilli</i>              | <i>Bacillales</i>         | <i>Bacillaceae</i>         | <i>Bacillus</i>       | 154.80              | 3.23               | 500.00                   |
| <i>Bacillus licheniformis</i>       | <i>Firmicutes</i>     | <i>Bacilli</i>              | <i>Bacillales</i>         | <i>Bacillaceae</i>         | <i>Bacillus</i>       | 162.60              | 3.08               | 500.00                   |
| <i>Bacillus cereus</i>              | <i>Firmicutes</i>     | <i>Bacilli</i>              | <i>Bacillales</i>         | <i>Bacillaceae</i>         | <i>Bacillus</i>       | 126.20              | 3.96               | 500.00                   |
| <i>Clostridium perfringens</i>      | <i>Firmicutes</i>     | <i>Clostridia</i>           | <i>Clostridiales</i>      | <i>Clostridiaceae</i>      | <i>Clostridium</i>    | 379.40              | 1.32               | 500.00                   |
| <i>Lactococcus lactis</i>           | <i>Firmicutes</i>     | <i>Bacilli</i>              | <i>Lactobacillales</i>    | <i>Streptococcaceae</i>    | <i>Lactococcus</i>    | 587.40              | 0.85               | 500.00                   |
| <i>Lactobacillus rhamnosus GG</i>   | <i>Firmicutes</i>     | <i>Bacilli</i>              | <i>Lactobacillales</i>    | <i>Lactobacillaceae</i>    | <i>Lactobacillus</i>  | 595.00              | 0.84               | 500.00                   |
| <i>Staphylococcus aureus</i>        | <i>Firmicutes</i>     | <i>Bacilli</i>              | <i>Bacillales</i>         | <i>Staphylococcaceae</i>   | <i>Staphylococcus</i> | 101.20              | 4.94               | 500.00                   |
| <i>Erysipelothrix rhusiopathiae</i> | <i>Firmicutes</i>     | <i>Erysipelotrichi</i>      | <i>Erysipelotrichales</i> | <i>Erysipelotrichaceae</i> | <i>Erysipelothrix</i> | 30.80               | 16.23              | 500.00                   |
| <i>Haemophilus parasuis</i>         | <i>Proteobacteria</i> | <i>Gammaproteobacteria</i>  | <i>Pasteurellales</i>     | <i>Pasteurellaceae</i>     | <i>Haemophilus</i>    | 44.00               | 11.36              | 500.00                   |
| <i>Staphylococcus .sp</i>           | <i>Proteobacteria</i> | <i>Gammaproteobacteria</i>  | <i>Pasteurellales</i>     | <i>Pasteurellaceae</i>     | <i>Pasteurella</i>    | 254.10              | 1.97               | 500.00                   |
| <i>Proteus mirabilis</i>            | <i>Proteobacteria</i> | <i>Gammaproteobacteria</i>  | <i>Enterobacteriales</i>  | <i>Enterobacteriaceae</i>  | <i>Proteus</i>        | 132.80              | 3.77               | 500.00                   |
| <i>Enteropathogenic E.coli</i>      | <i>Proteobacteria</i> | <i>Gammaproteobacteria</i>  | <i>Enterobacteriales</i>  | <i>Enterobacteriaceae</i>  | <i>Escherichia</i>    | 632.60              | 0.79               | 500.00                   |
| <i>Pseudomonas aeruginosa</i>       | <i>Proteobacteria</i> | <i>Gamma proteobacteria</i> | <i>Pseudomonadales</i>    | <i>Pseudomonadaceae</i>    | <i>Pseudomonas</i>    | 399.90              | 1.25               | 500.00                   |
| <i>Microbacterium lacticum</i>      | <i>Actinobacteria</i> | <i>Actinobacteria</i>       | <i>Actinomycetales</i>    | <i>Microbacteriaceae</i>   | <i>Microbacterium</i> | 126.20              | 3.96               | 500.00                   |
| <i>Trueperella pyogenes</i>         | <i>Actinobacteria</i> | <i>Actinobacteria</i>       | <i>Actinomycetales</i>    | <i>Actinomycetaceae</i>    | <i>Trueperella</i>    | 51.00               | 9.80               | 500.00                   |

b. Conformity of MC between qPCR and MiSeq quantitations.

| Bacterial species                   | Genus          | Raw reads of Mock | Clean reads of Mock | Assigned reads of Mock | Reads assigned at the genus level | qPCR                     |         | MiSeq   | MiSeq/qPCR |
|-------------------------------------|----------------|-------------------|---------------------|------------------------|-----------------------------------|--------------------------|---------|---------|------------|
|                                     |                |                   |                     |                        |                                   | Copies in mixed mock DNA | Percent | Percent |            |
| <i>Bacillus natto</i>               |                |                   |                     |                        |                                   | 4.91E+09                 |         |         |            |
| <i>Bacillus subtilis</i>            | Bacillus       |                   |                     |                        | 22,137                            | 3.71E+09                 | 38.84%  | 50.50%  | 1.30       |
| <i>Bacillus licheniformis</i>       |                |                   |                     |                        |                                   | 3.13E+09                 |         |         |            |
| <i>Bacillus cereus</i>              |                |                   |                     |                        |                                   | 9.04E+07                 |         |         |            |
| <i>Clostridium perfringens</i>      | Clostridium    |                   |                     |                        | 5,032                             | 2.96E+09                 | 9.72%   | 11.48%  | 1.18       |
| <i>Lactococcus lactis</i>           | Lactococcus    |                   |                     |                        | 2,023                             | 1.27E+09                 | 4.16%   | 4.62%   | 1.11       |
| <i>Lactobacillus rhamnosus GG</i>   | Lactobacillus  |                   |                     |                        | 513                               | 5.85E+08                 | 1.92%   | 1.17%   | 0.61       |
| <i>Staphylococcus aureus</i>        | Staphylococcus | 55,102            | 52,516              | 47,512                 | 1,142                             | 7.92E+08                 | 2.60%   | 2.61%   | 1.00       |
| <i>Erysipelothrix rhusiopathiae</i> | Erysipelothrix |                   |                     |                        | 1,581                             | 1.19E+09                 | 3.92%   | 3.61%   | 0.92       |
| <i>Haemophilus parasuis</i>         | Haemophilus    |                   |                     |                        | 1,316                             | 3.21E+09                 | 10.54%  | 3.00%   | 0.28       |
| <i>Staphylococcus .sp</i>           | Pasteurella    |                   |                     |                        | 776                               | 7.65E+08                 | 2.51%   | 1.77%   | 0.71       |
| <i>Proteus mirabilis</i>            | Proteus        |                   |                     |                        | 1,540                             | 3.12E+09                 | 10.25%  | 3.51%   | 0.34       |
| <i>Enteropathogenic E.coli</i>      | Escherichia    |                   |                     |                        | 415                               | 4.69E+08                 | 1.54%   | 0.95%   | 0.61       |
| <i>Pseudomonas aeruginosa</i>       | Pseudomonas    |                   |                     |                        | 1,597                             | 1.37E+09                 | 4.48%   | 3.64%   | 0.81       |
| <i>Microbacterium lacticum</i>      | Microbacterium |                   |                     |                        | 4,300                             | 2.08E+09                 | 6.83%   | 9.81%   | 1.44       |
| <i>Trueperella pyogenes</i>         | Trueperella    |                   |                     |                        | 1,460                             | 8.20E+08                 | 2.69%   | 3.33%   | 1.24       |

**Table S2. Summary of study samples and of fecal bacteria 16S rRNA amplicon sequence datasets**

| SampleID | Gender | Family | Mother | Phenotype    | Sample Source               | Time Sampling         | clean reads | Barcode Sequence | Reads assigned otu | No. of otu |
|----------|--------|--------|--------|--------------|-----------------------------|-----------------------|-------------|------------------|--------------------|------------|
| HS1      | M      | sow    | –      | Healthy      | Feces                       | 5 days after delivery | 24892       | TCCCTTGTCTCC     | 19037              | 970        |
| HS2      | M      | sow    | –      | Healthy      | Feces                       | 5 days after delivery | 36824       | ACGAGACTGATT     | 29365              | 1455       |
| HS3      | M      | sow    | –      | Healthy      | Feces                       | 5 days after delivery | 32373       | GCTGTACGGATT     | 25256              | 1561       |
| AS1      | M      | sow    | –      | Asymptomatic | Feces                       | 6 days after delivery | 25193       | ATCACCAGGTGT     | 20813              | 1004       |
| AS2      | M      | sow    | –      | Asymptomatic | Feces                       | 8 days after delivery | 20241       | TGGTCAACGATA     | 17121              | 768        |
| AS3      | M      | sow    | –      | Asymptomatic | Feces                       | 7 days after delivery | 62117       | ATCGCACAGTAA     | 49927              | 1183       |
| AS4      | M      | sow    | –      | Asymptomatic | Feces                       | 8 days after delivery | 36048       | GTCGTGTAGCCT     | 30697              | 1034       |
| DS1      | M      | sow    | –      | Diarrheal    | Feces                       | 7 days after delivery | 65244       | ACCGGTATGTAC     | 57791              | 637        |
| DS2      | M      | sow    | –      | Diarrheal    | Feces                       | 4 days after delivery | 41630       | AATTGTGTCGGA     | 36777              | 948        |
| DS3      | M      | sow    | –      | Diarrheal    | Feces                       | 7 days after delivery | 23870       | TGCATACACTGG     | 19723              | 907        |
| DS4      | M      | sow    | –      | Diarrheal    | Feces                       | 7 days after delivery | 24367       | AGTCGAACGAGG     | 20592              | 790        |
| HP1      | F      | piglet | HS1    | Healthy      | Feces & Intestinal contents | 5d                    | 52425       | ACCAGTACTCA      | 47180              | 622        |
| HP2      | M      | piglet | HS1    | Healthy      | Feces & Intestinal contents | 5d                    | 51565       | GAATACCAAGTC     | 45238              | 730        |
| HP3      | F      | piglet | HS2    | Healthy      | Feces & Intestinal contents | 5d                    | 26482       | GTAGATCGTGTA     | 24109              | 364        |
| HP4      | M      | piglet | HS2    | Healthy      | Feces & Intestinal contents | 5d                    | 38063       | TAACGTGTGTGC     | 35444              | 215        |
| AP1      | F      | piglet | DS1    | Asymptomatic | Feces & Intestinal contents | 7d                    | 39861       | CATTATGGCGTG     | 35106              | 494        |
| AP2      | M      | piglet | DS1    | Asymptomatic | Feces & Intestinal contents | 6d                    | 42423       | CCAATACGCCTG     | 39339              | 315        |
| AP3      | F      | piglet | DS2    | Asymptomatic | Feces & Intestinal contents | 3d                    | 87496       | GATCTGCGATCC     | 77746              | 565        |

|      |   |        |     |              |                             |    |       |              |       |     |
|------|---|--------|-----|--------------|-----------------------------|----|-------|--------------|-------|-----|
| AP4  | M | piglet | DS2 | Asymptomatic | Feces & Intestinal contents | 4d | 31337 | CAGCTCATCAGC | 27991 | 590 |
| AP5  | M | piglet | DS3 | Asymptomatic | Feces & Intestinal contents | 7d | 59401 | CAAACAACAGCT | 54802 | 342 |
| AP6  | F | piglet | DS3 | Asymptomatic | Feces & Intestinal contents | 7d | 46010 | GCAACACCATCC | 42403 | 291 |
| AP7  | F | piglet | DS4 | Asymptomatic | Feces & Intestinal contents | 8d | 27836 | GCGATATATCGC | 24570 | 371 |
| AP8  | M | piglet | AS1 | Asymptomatic | Feces & Intestinal contents | 8d | 29898 | CGAGCAATCCTA | 25217 | 788 |
| AP9  | F | piglet | AS1 | Asymptomatic | Feces & Intestinal contents | 9d | 49315 | AGTCGTGCACAT | 44587 | 445 |
| AP10 | M | piglet | AS2 | Asymptomatic | Feces & Intestinal contents | 3d | 32324 | GTATCTGCGCGT | 29137 | 294 |
| AP11 | F | piglet | AS2 | Asymptomatic | Feces & Intestinal contents | 3d | 27284 | CGAGGGAAAGTC | 22478 | 233 |
| AP12 | F | piglet | AS3 | Asymptomatic | Feces & Intestinal contents | 7d | 34535 | CAAATTCGGGAT | 30989 | 509 |
| AP13 | M | piglet | AS4 | Asymptomatic | Feces & Intestinal contents | 8d | 37624 | AGATTGACCAAC | 31992 | 566 |
| AP14 | F | piglet | AS4 | Asymptomatic | Feces & Intestinal contents | 8d | 26618 | AGTTACGAGCTA | 21616 | 820 |
| AP15 | M | piglet | AS4 | Asymptomatic | Feces & Intestinal contents | 8d | 36829 | GCATATGCACTG | 29792 | 700 |
| DP1  | F | piglet | DS1 | Diarrheal    | Feces & Intestinal contents | 8d | 21720 | CAACTCCCGTGA | 19347 | 308 |
| DP2  | M | piglet | DS1 | Diarrheal    | Feces & Intestinal contents | 8d | 39469 | TTGCGTTAGCAG | 36292 | 262 |
| DP3  | F | piglet | DS2 | Diarrheal    | Feces & Intestinal contents | 3d | 42777 | TACGAGCCCTAA | 39183 | 560 |
| DP4  | M | piglet | DS2 | Diarrheal    | Feces & Intestinal contents | 4d | 24678 | CACTACGCTAGA | 21633 | 320 |

|      |   |        |     |           |                             |    |       |              |       |     |
|------|---|--------|-----|-----------|-----------------------------|----|-------|--------------|-------|-----|
| DP5  | F | piglet | DS3 | Diarrheal | Feces & Intestinal contents | 7d | 36651 | TGCAGTCCTCGA | 32732 | 394 |
| DP6  | M | piglet | DS3 | Diarrheal | Feces & Intestinal contents | 7d | 29452 | ACCATAGCTCCG | 26038 | 560 |
| DP7  | F | piglet | DS4 | Diarrheal | Feces & Intestinal contents | 5d | 33382 | TCGACATCTCTT | 30892 | 275 |
| DP8  | F | piglet | DS4 | Diarrheal | Feces & Intestinal contents | 5d | 25983 | GAACACTTTGGA | 22430 | 497 |
| DP9  | M | piglet | AS1 | Diarrheal | Feces & Intestinal contents | 7d | 46236 | GAGCCATCTGTA | 41307 | 540 |
| DP10 | F | piglet | AS1 | Diarrheal | Feces & Intestinal contents | 7d | 31416 | TTGGGTACACGT | 29414 | 143 |
| DP11 | M | piglet | AS2 | Diarrheal | Feces & Intestinal contents | 3d | 22636 | AAGGCGCTCCTT | 19595 | 246 |
| DP12 | F | piglet | AS2 | Diarrheal | Feces & Intestinal contents | 3d | 47984 | TAATACGGATCG | 42449 | 327 |
| DP13 | M | piglet | AS3 | Diarrheal | Feces & Intestinal contents | 7d | 32571 | TCGGAATTAGAC | 30487 | 294 |
| DP14 | F | piglet | AS3 | Diarrheal | Feces & Intestinal contents | 7d | 39791 | TGTGAATTCGGA | 35657 | 390 |
| DP15 | M | piglet | AS4 | Diarrheal | Feces & Intestinal contents | 8d | 29271 | CATTCGTGGCGT | 23855 | 576 |

**Table S3 Statistics of alpha diversity indices**

| Group | SampleID | Shannon | Chao1 | Good's coverage | Observed species | Simpson |
|-------|----------|---------|-------|-----------------|------------------|---------|
| HS    | HS1      | 6.68    | 1467  | 0.96            | 970              | 0.95    |
|       | HS2      | 7.40    | 3189  | 0.96            | 1455             | 0.98    |
|       | HS3      | 7.64    | 2597  | 0.96            | 1561             | 0.98    |
| AS    | AS1      | 7.65    | 2853  | 0.95            | 1004             | 0.99    |
|       | AS2      | 7.09    | 1991  | 0.96            | 768              | 0.98    |
|       | AS3      | 7.69    | 2699  | 0.97            | 1183             | 0.99    |
|       | AS4      | 6.13    | 2366  | 0.97            | 1034             | 0.91    |
| DS    | DS1      | 4.96    | 2006  | 0.99            | 637              | 0.83    |
|       | DS2      | 7.19    | 2152  | 0.98            | 948              | 0.98    |
|       | DS3      | 7.07    | 1923  | 0.96            | 907              | 0.98    |
|       | DS4      | 6.69    | 1902  | 0.97            | 790              | 0.97    |
| HP    | HP1      | 5.50    | 1738  | 0.98            | 622              | 0.94    |
|       | HP2      | 5.53    | 2128  | 0.98            | 730              | 0.90    |
|       | HP3      | 4.62    | 1054  | 0.98            | 364              | 0.90    |
|       | HP4      | 2.94    | 598   | 0.99            | 215              | 0.74    |
| AP    | AP1      | 3.71    | 1842  | 0.98            | 494              | 0.83    |
|       | AP2      | 3.46    | 786   | 0.99            | 315              | 0.80    |
|       | AP3      | 5.50    | 2294  | 0.98            | 565              | 0.94    |
|       | AP4      | 5.11    | 1579  | 0.98            | 590              | 0.91    |
|       | AP5      | 3.66    | 1309  | 0.99            | 342              | 0.76    |
|       | AP6      | 3.14    | 1151  | 0.99            | 291              | 0.68    |
|       | AP7      | 4.53    | 1462  | 0.98            | 371              | 0.92    |
|       | AP8      | 5.65    | 2460  | 0.96            | 788              | 0.92    |
|       | AP9      | 3.57    | 1948  | 0.98            | 445              | 0.65    |
|       | AP10     | 4.11    | 629   | 0.99            | 294              | 0.89    |
|       | AP11     | 4.27    | 682   | 0.99            | 233              | 0.89    |
|       | AP12     | 4.77    | 1351  | 0.98            | 509              | 0.90    |
|       | AP13     | 6.53    | 2018  | 0.97            | 566              | 0.97    |
|       | AP14     | 6.65    | 2585  | 0.96            | 820              | 0.96    |
|       | AP15     | 6.85    | 2779  | 0.96            | 700              | 0.97    |
| DP    | DP1      | 3.82    | 1180  | 0.98            | 308              | 0.84    |
|       | DP2      | 2.70    | 1427  | 0.99            | 262              | 0.59    |
|       | DP3      | 4.49    | 1689  | 0.98            | 560              | 0.84    |
|       | DP4      | 3.92    | 1334  | 0.98            | 320              | 0.86    |
|       | DP5      | 4.20    | 1836  | 0.98            | 394              | 0.87    |
|       | DP6      | 6.11    | 1833  | 0.97            | 560              | 0.97    |
|       | DP7      | 3.64    | 716   | 0.99            | 275              | 0.83    |
|       | DP8      | 4.90    | 1548  | 0.97            | 497              | 0.91    |
|       | DP9      | 4.37    | 2442  | 0.98            | 540              | 0.77    |
|       | DP10     | 1.71    | 429   | 0.99            | 143              | 0.42    |
|       | DP11     | 4.02    | 1346  | 0.98            | 246              | 0.90    |
|       | DP12     | 3.35    | 1581  | 0.98            | 327              | 0.77    |
|       | DP13     | 3.62    | 726   | 0.99            | 294              | 0.82    |
|       | DP14     | 5.04    | 991   | 0.99            | 390              | 0.93    |
|       | DP15     | 6.50    | 2779  | 0.95            | 576              | 0.96    |



**Table S4 Comparison of bacteria abundance between HS and HP at phylum and genus level**

| Taxon                  | HP       | HS       |
|------------------------|----------|----------|
| a. phylum level        |          |          |
| <i>Bacteroidetes</i>   | 76.2902% | 47.3852% |
| <i>Firmicutes</i>      | 21.1751% | 34.5693% |
| <i>Proteobacteria</i>  | 2.1175%  | 5.7448%  |
| <i>Spirochaetes</i>    | 0.0224%  | 4.6424%  |
| <i>Tenericutes</i>     | 0.0316%  | 4.0518%  |
| <i>Verrucomicrobia</i> | 0.0000%  | 1.3600%  |
| <i>Fibrobacteres</i>   | 0.0000%  | 0.9164%  |
| <i>Planctomycetes</i>  | 0.0000%  | 0.3825%  |
| <i>Cyanobacteria</i>   | 0.0000%  | 0.1322%  |
| <i>Actinobacteria</i>  | 0.0461%  | 0.1145%  |
| <i>Lentisphaerae</i>   | 0.0165%  | 0.0940%  |
| <i>Thermi</i>          | 0.0020%  | 0.0000%  |
| <i>Fusobacteria</i>    | 0.1915%  | 0.0441%  |
| <i>Synergistetes</i>   | 0.0000%  | 0.0091%  |
| Unclassified           | 0.1073%  | 0.5536%  |
| b. genus level         |          |          |
| <i>Bacteroides</i>     | 49.3542% | 1.3875%  |
| <i>Prevotella</i>      | 12.2826% | 9.5658%  |
| <i>Parabacteroides</i> | 8.6852%  | 1.6454%  |
| <i>Lactobacillus</i>   | 8.2114%  | 0.8111%  |
| <i>Oscillospira</i>    | 1.2851%  | 2.5415%  |
| <i>YRC22</i>           | 0.0599%  | 7.0746%  |
| <i>CF231</i>           | 0.0671%  | 1.7188%  |
| <i>Streptococcus</i>   | 0.6679%  | 2.3392%  |
| <i>Ruminococcus</i>    | 0.4619%  | 1.1133%  |
| <i>Treponema</i>       | 0.0112%  | 4.0946%  |
| Other genera           | 3.6250%  | 7.5994%  |
| Unclassified           | 15.2884% | 60.1089% |

**Table S5 The bacterial abundance at the phylum level were comparison by**

## ANOVA among the sow (a) and piglet (b) groups

a. sow

| Microbiota                 | Abundance (%)              |                            |                             |
|----------------------------|----------------------------|----------------------------|-----------------------------|
|                            | HS                         | AS                         | DS                          |
| <i>Firmicutes</i>          | 34.57 ± 5.50 <sup>Ab</sup> | 54.36 ± 9.74 <sup>Aa</sup> | 35.30 ± 7.45 <sup>Ab</sup>  |
| <i>Bacteroidetes</i>       | 47.39 ± 7.42 <sup>Aa</sup> | 33.69 ± 7.86 <sup>Aa</sup> | 42.35 ± 13.02 <sup>Aa</sup> |
| <i>Actinobacteria</i>      | 0.11 ± 0.05 <sup>ABb</sup> | 0.28 ± 0.11 <sup>Aa</sup>  | 0.05 ± 0.09 <sup>Bb</sup>   |
| <i>Proteobacteria</i>      | 5.74 ± 4.29 <sup>Aa</sup>  | 2.16 ± 0.96 <sup>Aab</sup> | 1.26 ± 0.60 <sup>Ab</sup>   |
| <i>Spirochaetes</i>        | 4.64 ± 2.74 <sup>Aa</sup>  | 5.27 ± 0.83 <sup>Aa</sup>  | 9.31 ± 5.47 <sup>Aa</sup>   |
| <i>Fibrobacteres</i>       | 0.92 ± 0.66 <sup>Aab</sup> | 1.16 ± 0.71 <sup>Aa</sup>  | 0.01 ± 0.03 <sup>Ab</sup>   |
| <i>Tenericutes</i>         | 4.05 ± 3.09 <sup>Aa</sup>  | 1.89 ± 1.71 <sup>Aa</sup>  | 8.05 ± 5.29 <sup>Aa</sup>   |
| <i>Verrucomicrobia</i>     | 1.36 ± 0.97 <sup>Aa</sup>  | 0.58 ± 0.42 <sup>Aa</sup>  | 0.11 ± 0.14 <sup>Aa</sup>   |
| <i>Fusobacteria</i>        | 0.04 ± 0.07 <sup>Aa</sup>  | 0.04 ± 0.08 <sup>Aa</sup>  | 0.37 ± 0.42 <sup>Aa</sup>   |
| <i>Cyanobacteria</i>       | 0.13 ± 0.21 <sup>Aa</sup>  | 0.04 ± 0.03 <sup>Aa</sup>  | 0.02 ± 0.02 <sup>Aa</sup>   |
| <i>TM7</i>                 | 0.00 ± 0.00 <sup>Aa</sup>  | 0.01 ± 0.02 <sup>Aa</sup>  | 2.41 ± 4.52 <sup>Aa</sup>   |
| <i>Others/unclassified</i> | 1.04 ± 0.80 <sup>Aa</sup>  | 0.51 ± 0.47 <sup>Aa</sup>  | 0.77 ± 0.58 <sup>Aa</sup>   |

b. piglet

| Microbiota                 | Abundance (%)               |                             |                             |
|----------------------------|-----------------------------|-----------------------------|-----------------------------|
|                            | HS                          | AS                          | DS                          |
| <i>Firmicutes</i>          | 19.06 ± 15.20 <sup>Aa</sup> | 44.32 ± 29.55 <sup>Aa</sup> | 49.65 ± 29.13 <sup>Aa</sup> |
| <i>Bacteroidetes</i>       | 78.80 ± 17.33 <sup>Aa</sup> | 23.05 ± 20.15 <sup>Bb</sup> | 21.09 ± 23.11 <sup>Bb</sup> |
| <i>Proteobacteria</i>      | 1.77 ± 1.98 <sup>Aa</sup>   | 16.43 ± 27.34 <sup>Aa</sup> | 12.74 ± 15.87 <sup>Aa</sup> |
| <i>Fusobacteria</i>        | 0.17 ± 0.15 <sup>Aa</sup>   | 15.36 ± 25.59 <sup>Aa</sup> | 14.23 ± 24.65 <sup>Aa</sup> |
| <i>Actinobacteria</i>      | 0.04 ± 0.04 <sup>Aa</sup>   | 0.09 ± 0.13 <sup>Aa</sup>   | 1.83 ± 7.01 <sup>Aa</sup>   |
| <i>Tenericutes</i>         | 0.03 ± 0.03 <sup>ABab</sup> | 0.10 ± 0.09 <sup>Bb</sup>   | 0.03 ± 0.04 <sup>Aa</sup>   |
| <i>Spirochaetes</i>        | 0.02 ± 0.02 <sup>Aa</sup>   | 0.05 ± 0.06 <sup>Aa</sup>   | 0.03 ± 0.07 <sup>Aa</sup>   |
| <i>Fibrobacteres</i>       | 0.00 ± 0.00 <sup>Aa</sup>   | 0.00 ± 0.00 <sup>Aa</sup>   | 0.00 ± 0.00 <sup>Aa</sup>   |
| <i>Verrucomicrobia</i>     | 0.00 ± 0.00 <sup>Aa</sup>   | 0.04 ± 0.12 <sup>Aa</sup>   | 0.06 ± 0.20 <sup>Aa</sup>   |
| <i>Cyanobacteria</i>       | 0.00 ± 0.00 <sup>Aa</sup>   | 0.00 ± 0.00 <sup>Aa</sup>   | 0.00 ± 0.00 <sup>Aa</sup>   |
| <i>TM7</i>                 | 0.00 ± 0.00 <sup>Aa</sup>   | 0.03 ± 0.06 <sup>Aa</sup>   | 0.00 ± 0.00 <sup>Aa</sup>   |
| <i>Others/unclassified</i> | 0.11 ± 0.10 <sup>Aa</sup>   | 0.53 ± 1.10 <sup>Aa</sup>   | 0.34 ± 0.86 <sup>Aa</sup>   |

**Table S6 Relative differences in microbial taxa abundance for (a) HS versus (vs.) AS vs. DS, (b) HS vs. AS, (c) HS vs. DS, (d) AS vs. DS, (e) HP vs. AP vs. DP, (f) HP vs. AP, (g) HP vs. DP, and (h) AP vs. DP.**

a. HS vs. AS vs. DS

| Phylum        | Class                  | Order                     | Family                     | Genus                | Species           | LDA Score | Riched group | p-value |
|---------------|------------------------|---------------------------|----------------------------|----------------------|-------------------|-----------|--------------|---------|
|               |                        |                           |                            |                      |                   | 5.735     | AS           | 0.048*  |
|               | <i>Clostridia</i>      | <i>Clostridiales</i>      | <i>Mogibacteriaceae</i>    |                      |                   | 3.729     | AS           | 0.041*  |
|               | <i>Clostridia</i>      | <i>Clostridiales</i>      | <i>Other</i>               |                      |                   | 4.703     | AS           | 0.029*  |
|               | <i>Clostridia</i>      | <i>Clostridiales</i>      | <i>Christensenellaceae</i> |                      |                   | 4.665     | AS           | 0.024*  |
|               | <i>Clostridia</i>      | <i>Clostridiales</i>      | <i>Ruminococcaceae</i>     | <i>Oscillospira</i>  |                   | 4.503     | AS           | 0.027*  |
| Firmicutes    | <i>Bacilli</i>         | <i>Lactobacillales</i>    | <i>Streptococcaceae</i>    | <i>Streptococcus</i> |                   | 2.958     | AS           | 0.020*  |
|               | <i>Erysipelotrichi</i> | <i>Erysipelotrichales</i> | <i>Erysipelotrichaceae</i> | <i>L7A_E11</i>       |                   | 3.789     | DS           | 0.040*  |
|               | <i>Clostridia</i>      | <i>Clostridiales</i>      | <i>Clostridiaceae</i>      | <i>02d06</i>         |                   | 3.770     | HS           | 0.03*   |
|               | <i>Clostridia</i>      | <i>Clostridiales</i>      | <i>Veillonellaceae</i>     | <i>Anaerovibrio</i>  |                   | 2.764     | HS           | 0.028*  |
|               | <i>Clostridia</i>      | <i>Clostridiales</i>      | <i>Clostridiaceae</i>      | <i>Clostridium</i>   | <i>butyricum</i>  | 3.445     | HS           | 0.028*  |
|               | <i>Bacilli</i>         | <i>Lactobacillales</i>    | <i>Lactobacillaceae</i>    | <i>Lactobacillus</i> | <i>salivarius</i> | 3.025     | DS           | 0.030*  |
|               | <i>Flavobacteriia</i>  |                           |                            |                      |                   | 2.926     | HS           | 0.016*  |
|               | <i>Bacteroidia</i>     | <i>Bacteroidales</i>      |                            |                      |                   | 5.110     | HS           | 0.049*  |
|               | <i>Flavobacteriia</i>  | <i>Flavobacteriales</i>   |                            |                      |                   | 2.926     | HS           | 0.016*  |
|               | <i>Flavobacteriia</i>  | <i>Flavobacteriales</i>   | <i>Flavobacteriaceae</i>   |                      |                   | 2.805     | HS           | 0.016*  |
| Bacteroidetes | <i>Bacteroidia</i>     | <i>Bacteroidales</i>      | <i>S24_7</i>               |                      |                   | 4.865     | AS           | 0.028*  |
|               | <i>Bacteroidia</i>     | <i>Bacteroidales</i>      | <i>RF16</i>                |                      |                   | 3.632     | DS           | 0.048*  |
|               | <i>Bacteroidia</i>     | <i>Bacteroidales</i>      | <i>Prevotellaceae</i>      | <i>Other</i>         |                   | 2.477     | HS           | 0.016*  |
|               | <i>Bacteroidia</i>     | <i>Bacteroidales</i>      | <i>Prevotellaceae</i>      | <i>Prevotella</i>    | <i>Other</i>      | 3.095     | HS           | 0.039*  |
|               | <i>Bacteroidia</i>     | <i>Bacteroidales</i>      | <i>Paraprevotellaceae</i>  | <i>YRC22</i>         |                   | 4.938     | HS           | 0.019*  |

|                       |                            |                           |                            |                         |       |       |         |         |
|-----------------------|----------------------------|---------------------------|----------------------------|-------------------------|-------|-------|---------|---------|
|                       | <i>Gammaproteobacteria</i> |                           |                            |                         | 4.666 | HS    | 0.020*  |         |
|                       | <i>Gammaproteobacteria</i> | <i>Xanthomonadales</i>    |                            |                         | 3.156 | HS    | 0.016*  |         |
|                       | <i>Deltaproteobacteria</i> | <i>Desulfovibrionales</i> |                            |                         | 3.674 | AS    | 0.035*  |         |
| Proteobacteria        | <i>Gammaproteobacteria</i> | <i>Aeromonadales</i>      |                            |                         | 2.851 | HS    | 0.046*  |         |
|                       | <i>Gammaproteobacteria</i> | <i>Pseudomonadales</i>    |                            |                         | 4.501 | HS    | 0.036*  |         |
|                       | <i>Gammaproteobacteria</i> | <i>Xanthomonadales</i>    | <i>Xanthomonadaceae</i>    |                         | 3.156 | HS    | 0.016*  |         |
|                       | <i>Gammaproteobacteria</i> | <i>Xanthomonadales</i>    | <i>Xanthomonadaceae</i>    | <i>Stenotrophomonas</i> | 2.584 | HS    | 0.016*  |         |
|                       | <i>Deltaproteobacteria</i> | <i>Desulfovibrionales</i> | <i>Desulfovibrionaceae</i> | <i>Desulfovibrio</i>    | 3.655 | AS    | 0.035*  |         |
|                       |                            |                           |                            |                         | 3.447 | AS    | 0.022*  |         |
|                       | Actinobacteria             | <i>Coriobacteriia</i>     |                            |                         |       | 3.447 | AS      | 0.009** |
|                       |                            | <i>Coriobacteriia</i>     | <i>Coriobacteriales</i>    |                         |       | 3.447 | AS      | 0.009** |
| <i>Coriobacteriia</i> |                            | <i>Coriobacteriales</i>   | <i>Coriobacteriaceae</i>   | <i>Other</i>            | 3.366 | AS    | 0.009** |         |
|                       |                            |                           |                            |                         | 4.064 | AS    | 0.028*  |         |
| Fibrobacteres         | <i>Fibrobacteria</i>       |                           |                            |                         | 4.064 | AS    | 0.028*  |         |
|                       | <i>Fibrobacteria</i>       | <i>Fibrobacterales</i>    |                            |                         | 4.064 | AS    | 0.028*  |         |
|                       | <i>Fibrobacteria</i>       | <i>Fibrobacterales</i>    | <i>Fibrobacteraceae</i>    |                         | 4.064 | AS    | 0.028*  |         |
|                       | <i>Fibrobacteria</i>       | <i>Fibrobacterales</i>    | <i>Fibrobacteraceae</i>    | <i>Fibrobacter</i>      | 4.064 | AS    | 0.025*  |         |
|                       |                            |                           |                            |                         | 4.004 | DS    | 0.02*   |         |
| Tenericutes           | <i>RF3</i>                 |                           |                            |                         | 4.004 | DS    | 0.02*   |         |
|                       | <i>RF3</i>                 | <i>ML615J_28</i>          |                            |                         | 4.466 | DS    | 0.031*  |         |
|                       | <i>Mollicutes</i>          | <i>Anaeroplasmatales</i>  |                            |                         | 4.402 | DS    | 0.031*  |         |
|                       | <i>Mollicutes</i>          | <i>Anaeroplasmatales</i>  | <i>Anaeroplasmataceae</i>  | <i>Anaeroplasma</i>     | 4.402 | DS    | 0.031*  |         |

\*: p<0.05. \*\*: p<0.01.

b. HS vs. DS

| Phylum            | Class                  | Order                     | Family                       | Genus                     | Species           | LDA Score | Riched group | p-value |
|-------------------|------------------------|---------------------------|------------------------------|---------------------------|-------------------|-----------|--------------|---------|
| Firmicutes        | <i>Clostridia</i>      | <i>Clostridiales</i>      | <i>Christensenellaceae</i>   |                           |                   | 4.388     | HS           | 0.034*  |
|                   | <i>Clostridia</i>      | <i>Clostridiales</i>      | <i>Mogibacteriaceae</i>      |                           |                   | 3.600     | DS           | 0.034*  |
|                   | <i>Clostridia</i>      | <i>Clostridiales</i>      | <i>Peptostreptococcaceae</i> |                           |                   | 3.848     | DS           | 0.032*  |
|                   | <i>Clostridia</i>      | <i>Clostridiales</i>      | <i>Peptostreptococcaceae</i> | <i>Peptostreptococcus</i> |                   | 3.421     | DS           | 0.028*  |
|                   | <i>Clostridia</i>      | <i>Clostridiales</i>      | <i>Ruminococcaceae</i>       | <i>Oscillospira</i>       |                   | 4.385     | HS           | 0.034*  |
|                   | <i>Clostridia</i>      | <i>Clostridiales</i>      | <i>Clostridiaceae</i>        | <i>02d06</i>              |                   | 3.770     | HS           | 0.032*  |
|                   | <i>Erysipelotrichi</i> | <i>Erysipelotrichales</i> | <i>Erysipelotrichaceae</i>   | <i>L7A_E11</i>            |                   | 3.789     | DS           | 0.034*  |
|                   | <i>Bacilli</i>         | <i>Lactobacillales</i>    | <i>Streptococcaceae</i>      | <i>Streptococcus</i>      |                   | 2.724     | HS           | 0.019*  |
|                   | <i>Clostridia</i>      | <i>Clostridiales</i>      | <i>Veillonellaceae</i>       | <i>Anaerovibrio</i>       |                   | 2.764     | HS           | 0.019*  |
|                   | <i>Clostridia</i>      | <i>Clostridiales</i>      | <i>Clostridiaceae</i>        | <i>Clostridium</i>        | <i>butyricum</i>  | 3.445     | HS           | 0.028*  |
| <i>Clostridia</i> | <i>Clostridiales</i>   | <i>Lachnospiraceae</i>    | <i>Ruminococcus</i>          | <i>gnavus</i>             | 2.990             | DS        | 0.034*       |         |
| Bacteroidetes     | <i>Flavobacteriia</i>  |                           |                              |                           |                   | 2.926     | HS           | 0.028*  |
|                   | <i>Bacteroidia</i>     | <i>Bacteroidales</i>      |                              |                           |                   | 5.110     | HS           | 0.034*  |
|                   | <i>Flavobacteriia</i>  | <i>Flavobacteriales</i>   |                              |                           |                   | 2.926     | HS           | 0.028*  |
|                   | <i>Flavobacteriia</i>  | <i>Flavobacteriales</i>   | <i>Flavobacteriaceae</i>     |                           |                   | 2.805     | HS           | 0.028*  |
|                   | <i>Flavobacteriia</i>  | <i>Flavobacteriales</i>   | <i>Cryomorphaceae</i>        |                           |                   | 2.315     | HS           | 0.019*  |
|                   | <i>Bacteroidia</i>     | <i>Bacteroidales</i>      | <i>BS11</i>                  |                           |                   | 3.630     | HS           | 0.019*  |
|                   | <i>Bacteroidia</i>     | <i>Bacteroidales</i>      | <i>Porphyromonadaceae</i>    |                           |                   | 4.197     | HS           | 0.034*  |
|                   | <i>Bacteroidia</i>     | <i>Bacteroidales</i>      | <i>Paraprevotellaceae</i>    | <i>YRC22</i>              |                   | 4.938     | HS           | 0.032*  |
|                   | <i>Flavobacteriia</i>  | <i>Flavobacteriales</i>   | <i>Cryomorphaceae</i>        | <i>Fluviicola</i>         |                   | 2.315     | HS           | 0.019*  |
|                   | <i>Bacteroidia</i>     | <i>Bacteroidales</i>      | <i>Porphyromonadaceae</i>    | <i>Parabacteroides</i>    | <i>distasonis</i> | 3.352     | HS           | 0.034*  |
|                   | <i>Bacteroidia</i>     | <i>Bacteroidales</i>      | <i>Prevotellaceae</i>        | <i>Prevotellaceae</i>     | Other             | 2.477     | HS           | 0.028*  |
|                   | <i>Bacteroidia</i>     | <i>Bacteroidales</i>      | <i>Prevotellaceae</i>        | <i>Prevotella</i>         | Other             | 3.095     | HS           | 0.028*  |

|                |                            |                         |                             |                          |                    |       |        |        |
|----------------|----------------------------|-------------------------|-----------------------------|--------------------------|--------------------|-------|--------|--------|
|                |                            |                         |                             |                          | 4.759              | HS    | 0.034* |        |
|                | <i>Gammaproteobacteria</i> |                         |                             |                          | 4.666              | HS    | 0.034* |        |
|                | <i>Gammaproteobacteria</i> | <i>Xanthomonadales</i>  |                             |                          | 3.156              | HS    | 0.028* |        |
|                | <i>Gammaproteobacteria</i> | <i>Pseudomonadales</i>  |                             |                          | 4.501              | HS    | 0.028* |        |
|                | <i>Alphaproteobacteria</i> | <i>Rhodobacterales</i>  |                             |                          | 3.193              | HS    | 0.019* |        |
|                | <i>Gammaproteobacteria</i> | <i>Xanthomonadales</i>  | <i>Xanthomonadaceae</i>     |                          | 3.156              | HS    | 0.028* |        |
|                | <i>Betaproteobacteria</i>  | <i>Burkholderiales</i>  | <i>Comamonadaceae</i>       |                          | 3.016              | HS    | 0.019* |        |
| Proteobacteria | <i>Alphaproteobacteria</i> | <i>Rhodobacterales</i>  | <i>Rhodobacteraceae</i>     |                          | 3.193              | HS    | 0.019* |        |
|                | <i>Gammaproteobacteria</i> | <i>Xanthomonadales</i>  | <i>Xanthomonadaceae</i>     | <i>Stenotrophomonas</i>  | 2.584              | HS    | 0.028* |        |
|                | <i>Betaproteobacteria</i>  | <i>Burkholderiales</i>  | <i>Comamonadaceae</i>       | <i>Comamonas</i>         | 2.576              | HS    | 0.019* |        |
|                | <i>Alphaproteobacteria</i> | <i>Rhodobacterales</i>  | <i>Rhodobacteraceae</i>     | <i>Rhodobacter</i>       | 3.193              | HS    | 0.019* |        |
|                | <i>Betaproteobacteria</i>  | <i>Burkholderiales</i>  | <i>Comamonadaceae</i>       | <i>Other</i>             | 2.313              | HS    | 0.019* |        |
|                | <i>Betaproteobacteria</i>  | <i>Burkholderiales</i>  | <i>Comamonadaceae</i>       | <i>Leptothrix</i>        | 2.279              | HS    | 0.019* |        |
|                | <i>Gammaproteobacteria</i> | <i>Pseudomonadales</i>  | <i>Pseudomonadaceae</i>     | <i>Pseudomonas</i>       | 2.706              | HS    | 0.019* |        |
|                | <i>Gammaproteobacteria</i> | <i>Pseudomonadales</i>  | <i>Pseudomonadaceae</i>     | <i>Pseudomonas</i>       | <i>viridiflava</i> | 2.804 | HS     | 0.019* |
|                | <i>Coriobacteriia</i>      |                         |                             |                          | 2.933              | HS    | 0.019* |        |
|                | <i>Coriobacteriia</i>      | <i>Coriobacteriales</i> |                             |                          | 2.933              | HS    | 0.019* |        |
|                | <i>Actinobacteria</i>      | <i>Actinomycetales</i>  | <i>Propionibacteriaceae</i> |                          | 2.459              | HS    | 0.019* |        |
| Actinobacteria | <i>Coriobacteriia</i>      | <i>Coriobacteriales</i> | <i>Coriobacteriaceae</i>    |                          | 2.351              | HS    | 0.019* |        |
|                | <i>Actinobacteria</i>      | <i>Actinomycetales</i>  | <i>Propionibacteriaceae</i> | <i>Propionibacterium</i> | 2.459              | HS    | 0.019* |        |
|                | <i>Coriobacteriia</i>      | <i>Coriobacteriales</i> | <i>Coriobacteriaceae</i>    | <i>Other</i>             | 2.801              | HS    | 0.019* |        |
|                | <i>Actinobacteria</i>      | <i>Actinomycetales</i>  | <i>Propionibacteriaceae</i> | <i>Propionibacterium</i> | <i>acnes</i>       | 2.459 | HS     | 0.019* |
|                |                            |                         |                             |                          | 3.962              | HS    | 0.028* |        |
|                | <i>Fibrobacteria</i>       |                         |                             |                          | 3.962              | HS    | 0.028* |        |
| Fibrobacteres  | <i>Fibrobacteria</i>       | <i>Fibrobacterales</i>  |                             |                          | 3.962              | HS    | 0.028* |        |

|             |                      |                          |                           |                     |       |    |        |
|-------------|----------------------|--------------------------|---------------------------|---------------------|-------|----|--------|
|             | <i>Fibrobacteria</i> | <i>Fibrobacterales</i>   | <i>Fibrobacteraceae</i>   |                     | 3.962 | HS | 0.028* |
|             | <i>Fibrobacteria</i> | <i>Fibrobacterales</i>   | <i>Fibrobacteraceae</i>   | <i>Fibrobacter</i>  | 3.753 | HS | 0.028* |
| Tenericutes | <i>RF3</i>           |                          |                           |                     | 4.004 | DS | 0.034* |
|             | <i>Mollicutes</i>    | <i>Anaeroplasmatales</i> |                           |                     | 4.466 | DS | 0.034* |
|             | <i>RF3</i>           | <i>ML615J_28</i>         |                           |                     | 4.004 | DS | 0.034* |
|             | <i>Mollicutes</i>    | <i>Anaeroplasmatales</i> | <i>Anaeroplasmataceae</i> | <i>Anaeroplasma</i> | 4.402 | DS | 0.034* |

c. HS vs. AS

| Phylum        | Class                      | Order                   | Family                   | Genus                 | Species          | LDA Score | Riched group | p-value |
|---------------|----------------------------|-------------------------|--------------------------|-----------------------|------------------|-----------|--------------|---------|
| Firmicutes    |                            |                         |                          |                       |                  | 5.735     | AS           | 0.034*  |
|               | <i>Clostridia</i>          | <i>Clostridiales</i>    | <i>Mogibacteriaceae</i>  |                       |                  | 3.729     | AS           | 0.034*  |
|               | <i>Clostridia</i>          | <i>Clostridiales</i>    | <i>Other</i>             |                       |                  | 4.703     | AS           | 0.034*  |
|               | <i>Clostridia</i>          | <i>Clostridiales</i>    | <i>Clostridiaceae</i>    | <i>Clostridium</i>    | <i>butyricum</i> | 3.445     | HS           | 0.028*  |
| Bacteroidetes |                            |                         |                          |                       |                  | 5.676     | HS           | 0.034*  |
|               | <i>Bacteroidia</i>         |                         |                          |                       |                  | 5.674     | HS           | 0.034*  |
|               | <i>Flavobacteriia</i>      |                         |                          |                       |                  | 2.926     | HS           | 0.019*  |
|               | <i>Bacteroidia</i>         | <i>Bacteroidales</i>    |                          |                       |                  | 5.110     | HS           | 0.034*  |
|               | <i>Flavobacteriia</i>      | <i>Flavobacteriales</i> |                          |                       |                  | 2.926     | HS           | 0.019*  |
|               | <i>Flavobacteriia</i>      | <i>Flavobacteriales</i> | <i>Flavobacteriaceae</i> |                       |                  | 2.805     | HS           | 0.019*  |
|               | <i>Flavobacteriia</i>      | <i>Flavobacteriales</i> | <i>Cryomorphaceae</i>    |                       |                  | 2.315     | HS           | 0.019*  |
|               | <i>Bacteroidia</i>         | <i>Bacteroidales</i>    | <i>BS11</i>              |                       |                  | 3.630     | HS           | 0.019*  |
|               | <i>Flavobacteriia</i>      | <i>Flavobacteriales</i> | <i>Cryomorphaceae</i>    | <i>Fluviicola</i>     |                  | 2.315     | HS           | 0.019*  |
|               | <i>Bacteroidia</i>         | <i>Bacteroidales</i>    | <i>Prevotellaceae</i>    | <i>Prevotellaceae</i> | <i>Other</i>     | 2.477     | HS           | 0.019*  |
|               | <i>Alphaproteobacteria</i> |                         |                          |                       |                  | 3.295     | HS           | 0.028*  |

|                |                            |                         |                             |                                       |       |    |        |
|----------------|----------------------------|-------------------------|-----------------------------|---------------------------------------|-------|----|--------|
|                | <i>Gammaproteobacteria</i> | <i>Pseudomonadales</i>  |                             |                                       | 4.501 | HS | 0.032* |
|                | <i>Gammaproteobacteria</i> | <i>Xanthomonadales</i>  |                             |                                       | 3.156 | HS | 0.019* |
| Proteobacteria | <i>Alphaproteobacteria</i> | <i>Rhodobacterales</i>  |                             |                                       | 3.193 | HS | 0.019* |
|                | <i>Gammaproteobacteria</i> | <i>Aeromonadales</i>    |                             |                                       | 2.851 | HS | 0.019* |
|                | <i>Alphaproteobacteria</i> | <i>Rhodobacterales</i>  | <i>Rhodobacteraceae</i>     |                                       | 3.193 | HS | 0.019* |
|                | <i>Gammaproteobacteria</i> | <i>Xanthomonadales</i>  | <i>Xanthomonadaceae</i>     |                                       | 3.156 | HS | 0.019* |
|                | <i>Betaproteobacteria</i>  | <i>Burkholderiales</i>  | <i>Comamonadaceae</i>       |                                       | 3.016 | HS | 0.019* |
|                | <i>Betaproteobacteria</i>  | <i>Burkholderiales</i>  | <i>Comamonadaceae</i>       | <i>Comamonas</i>                      | 2.576 | HS | 0.019* |
|                | <i>Betaproteobacteria</i>  | <i>Burkholderiales</i>  | <i>Comamonadaceae</i>       | <i>Leptothrix</i>                     | 2.279 | HS | 0.019* |
|                | <i>Gammaproteobacteria</i> | <i>Xanthomonadales</i>  | <i>Xanthomonadaceae</i>     | <i>Stenotrophomonas</i>               | 2.584 | HS | 0.019* |
|                | <i>Gammaproteobacteria</i> | <i>Pseudomonadales</i>  | <i>Pseudomonadaceae</i>     | <i>Pseudomonas</i>                    | 2.804 | HS | 0.019* |
|                | <i>Alphaproteobacteria</i> | <i>Rhodobacterales</i>  | <i>Rhodobacteraceae</i>     | <i>Rhodobacter</i>                    | 3.193 | HS | 0.019* |
|                | <i>Betaproteobacteria</i>  | <i>Burkholderiales</i>  | <i>Comamonadaceae</i>       | <i>Comamonadaceae</i> Other           | 2.313 | HS | 0.019* |
|                | <i>Gammaproteobacteria</i> | <i>Pseudomonadales</i>  | <i>Pseudomonadaceae</i>     | <i>Pseudomonas</i> Other              | 2.706 | HS | 0.019* |
|                |                            |                         |                             |                                       | 3.447 | AS | 0.034* |
|                | <i>Actinobacteria</i>      |                         |                             |                                       | 2.459 | HS | 0.019* |
|                | <i>Coriobacteriia</i>      |                         |                             |                                       | 3.447 | AS | 0.034* |
|                | <i>Actinobacteria</i>      | <i>Actinomycetales</i>  |                             |                                       | 2.459 | HS | 0.019* |
| Actinobacteria | <i>Coriobacteriia</i>      | <i>Coriobacteriales</i> |                             |                                       | 3.447 | AS | 0.034* |
|                | <i>Actinobacteria</i>      | <i>Actinomycetales</i>  | <i>Propionibacteriaceae</i> |                                       | 2.459 | HS | 0.019* |
|                | <i>Actinobacteria</i>      | <i>Actinomycetales</i>  | <i>Propionibacteriaceae</i> | <i>Propionibacterium</i>              | 2.459 | HS | 0.019* |
|                | <i>Coriobacteriia</i>      | <i>Coriobacteriales</i> | <i>Coriobacteriaceae</i>    | <i>Coriobacteriaceae</i> Other        | 3.366 | AS | 0.034* |
|                | <i>Actinobacteria</i>      | <i>Actinomycetales</i>  | <i>Propionibacteriaceae</i> | <i>Propionibacterium</i> <i>acnes</i> | 2.459 | HS | 0.019* |



## d. AS vs. DS

| Phylum         | Class                      | Order                     | Family                     | Genus                | LDA Score | Riched group | p-value |
|----------------|----------------------------|---------------------------|----------------------------|----------------------|-----------|--------------|---------|
|                |                            |                           |                            |                      | 5.735     | AS           | 0.043*  |
|                | <i>Clostridia</i>          |                           |                            |                      | 5.624     | AS           | 0.043*  |
| Firmicutes     | <i>Clostridia</i>          | <i>Clostridiales</i>      | <i>Clostridiales</i>       |                      | 4.703     | AS           | 0.021*  |
|                | <i>Clostridia</i>          | <i>Clostridiales</i>      | <i>Christensenellaceae</i> |                      | 4.665     | AS           | 0.021*  |
|                | <i>Clostridia</i>          | <i>Clostridiales</i>      | <i>Ruminococcaceae</i>     | <i>Oscillospira</i>  | 4.503     | AS           | 0.021*  |
|                | <i>Clostridia</i>          | <i>Clostridiales</i>      | <i>Clostridiaceae</i>      | <i>02d06</i>         | 3.612     | AS           | 0.020*  |
|                | <i>Bacteroidia</i>         | <i>Bacteroidales</i>      | <i>RF16</i>                |                      | 3.632     | DS           | 0.021*  |
|                | <i>Bacteroidia</i>         | <i>Bacteroidales</i>      | <i>S24_7</i>               |                      | 4.865     | AS           | 0.021*  |
| Bacteroidetes  | <i>Bacteroidia</i>         | <i>Bacteroidales</i>      | <i>Bacteroidaceae</i>      |                      | 4.494     | DS           | 0.043*  |
|                | <i>Bacteroidia</i>         | <i>Bacteroidales</i>      | <i>Bacteroidaceae</i>      | <i>Bacteroides</i>   | 4.494     | DS           | 0.043*  |
|                | <i>Bacteroidia</i>         | <i>Bacteroidales</i>      | <i>Paraprevotellaceae</i>  | <i>YRC22</i>         | 3.835     | AS           | 0.020*  |
|                | <i>Bacteroidia</i>         | <i>Bacteroidales</i>      | <i>Rikenellaceae</i>       | <i>Other</i>         | 2.141     | DS           | 0.047*  |
|                | <i>Deltaproteobacteria</i> |                           |                            |                      | 3.751     | AS           | 0.021*  |
|                | <i>Gammaproteobacteria</i> |                           |                            |                      | 4.131     | AS           | 0.021*  |
| Proteobacteria | <i>Deltaproteobacteria</i> | <i>Desulfovibrionales</i> |                            |                      | 3.674     | AS           | 0.021*  |
|                | <i>Gammaproteobacteria</i> | <i>Enterobacteriales</i>  |                            |                      | 4.126     | AS           | 0.021*  |
|                | <i>Gammaproteobacteria</i> | <i>Enterobacteriales</i>  | <i>Enterobacteriaceae</i>  |                      | 3.386     | AS           | 0.021*  |
|                | <i>Deltaproteobacteria</i> | <i>Desulfovibrionales</i> | <i>Desulfovibrionaceae</i> |                      | 3.674     | AS           | 0.021*  |
|                | <i>Deltaproteobacteria</i> | <i>Desulfovibrionales</i> | <i>Desulfovibrionaceae</i> | <i>Desulfovibrio</i> | 3.655     | AS           | 0.021*  |
|                | <i>Gammaproteobacteria</i> | <i>Enterobacteriales</i>  | <i>Enterobacteriaceae</i>  | <i>Other</i>         | 4.037     | AS           | 0.021*  |
| Actinobacteria |                            |                           |                            |                      | 3.447     | AS           | 0.018*  |
|                | <i>Coriobacteriia</i>      |                           |                            |                      | 3.447     | AS           | 0.014*  |

|                 |                       |                         |                          |                    |       |    |        |
|-----------------|-----------------------|-------------------------|--------------------------|--------------------|-------|----|--------|
|                 | <i>Coriobacteriia</i> | <i>Coriobacteriales</i> |                          |                    | 3.447 | AS | 0.014* |
|                 | <i>Coriobacteriia</i> | <i>Coriobacteriales</i> | <i>Coriobacteriaceae</i> |                    | 2.461 | AS | 0.047* |
|                 | <i>Coriobacteriia</i> | <i>Coriobacteriales</i> | <i>Coriobacteriaceae</i> | <i>Other</i>       | 3.366 | AS | 0.014* |
|                 |                       |                         |                          |                    | 4.064 | AS | 0.018* |
|                 | <i>Fibrobacteria</i>  |                         |                          |                    | 4.064 | AS | 0.018* |
| Fibrobacteres   | <i>Fibrobacteria</i>  | <i>Fibrobacterales</i>  |                          |                    | 4.064 | AS | 0.018* |
|                 | <i>Fibrobacteria</i>  | <i>Fibrobacterales</i>  | <i>Fibrobacteraceae</i>  |                    | 4.064 | AS | 0.018* |
|                 | <i>Fibrobacteria</i>  | <i>Fibrobacterales</i>  | <i>Fibrobacteraceae</i>  | <i>Fibrobacter</i> | 4.064 | AS | 0.018* |
|                 |                       |                         |                          |                    | 4.906 | DS | 0.043* |
| Tenericutes     | <i>RF3</i>            |                         |                          |                    | 4.004 | DS | 0.021* |
|                 | <i>RF3</i>            | <i>ML615J_28</i>        |                          |                    | 4.004 | DS | 0.021* |
|                 |                       |                         |                          |                    | 3.765 | AS | 0.043* |
|                 | <i>Verruco_5</i>      |                         |                          |                    | 3.753 | AS | 0.042* |
| Verrucomicrobia | <i>Verruco_5</i>      | <i>WCHB1_41</i>         |                          |                    | 3.753 | AS | 0.042* |
|                 | <i>Verruco_5</i>      | <i>WCHB1_41</i>         | <i>RFP12</i>             |                    | 3.742 | AS | 0.042* |

e. HP vs. AP vs. DP

| Phylum         | Class                      | Order                  | Family                       | Genus                     | LDA Score | Riched group | p-value |
|----------------|----------------------------|------------------------|------------------------------|---------------------------|-----------|--------------|---------|
| Firmicutes     | <i>Bacilli</i>             | <i>Lactobacillales</i> | <i>Enterococcaceae</i>       |                           | 3.287     | DP           | 0.039*  |
|                | <i>Clostridia</i>          | <i>Clostridiales</i>   | <i>Veillonellaceae</i>       |                           | 4.846     | DP           | 0.021*  |
|                | <i>Clostridia</i>          | <i>Clostridiales</i>   | <i>Clostridiaceae</i>        | <i>SMB53</i>              | 3.997     | AP           | 0.016*  |
|                | <i>Clostridia</i>          | <i>Clostridiales</i>   | <i>Peptostreptococcaceae</i> | <i>Peptostreptococcus</i> | 4.165     | DP           | 0.042*  |
|                | <i>Bacilli</i>             | <i>Lactobacillales</i> | <i>Enterococcaceae</i>       | <i>Enterococcus</i>       | 3.209     | DP           | 0.039*  |
|                | <i>Bacilli</i>             | <i>Lactobacillales</i> | <i>Lactobacillaceae</i>      | <i>Lactobacillus</i>      | 4.828     | DP           | 0.012*  |
| Bacteroidetes  | <i>Bacteroidia</i>         | <i>Bacteroidales</i>   |                              |                           | 4.038     | AP           | 0.020*  |
|                | <i>Bacteroidia</i>         | <i>Bacteroidales</i>   | <i>Bacteroidales</i>         |                           | 3.707     | HP           | 0.011*  |
|                | <i>Bacteroidia</i>         | <i>Bacteroidales</i>   | <i>Prevotellaceae</i>        | <i>Prevotella</i>         | 4.962     | HP           | 0.041*  |
|                | <i>Bacteroidia</i>         | <i>Bacteroidales</i>   | <i>Prevotellaceae</i>        | <i>Prevotella_others</i>  | 3.690     | HP           | 0.032*  |
|                | <i>Bacteroidia</i>         | <i>Bacteroidales</i>   | <i>Odoribacteraceae</i>      | <i>Odoribacter</i>        | 3.172     | HP           | 0.026*  |
|                | <i>Bacteroidia</i>         | <i>Bacteroidales</i>   | <i>Porphyromonadaceae</i>    | <i>Parabacteroides</i>    | 3.241     | HP           | 0.007** |
|                | <i>Bacteroidia</i>         | <i>Bacteroidales</i>   | <i>Paraprevotellaceae</i>    | <i>CF231</i>              | 2.887     | AP           | 0.031*  |
|                | <i>Bacteroidia</i>         | <i>Bacteroidales</i>   | <i>Porphyromonadaceae</i>    | <i>Porphyromonas</i>      | 3.284     | DP           | 0.006** |
| Proteobacteria | <i>Alphaproteobacteria</i> |                        |                              |                           | 2.526     | AP           | 0.047*  |
|                | <i>Betaproteobacteria</i>  |                        |                              |                           | 4.424     | AP           | 0.026*  |
|                | <i>Betaproteobacteria</i>  | <i>Burkholderiales</i> |                              |                           | 4.421     | AP           | 0.024*  |
|                | <i>Gammaproteobacteria</i> | <i>Xanthomonadales</i> |                              |                           | 1.774     | HP           | 0.041*  |
|                | <i>Gammaproteobacteria</i> | <i>Xanthomonadales</i> | <i>Xanthomonadaceae</i>      |                           | 1.774     | HP           | 0.041*  |
|                | <i>Gammaproteobacteria</i> | <i>Xanthomonadales</i> | <i>Xanthomonadaceae</i>      | <i>Stenotrophomonas</i>   | 1.774     | HP           | 0.041*  |
|                | <i>Gammaproteobacteria</i> | <i>Pasteurellales</i>  | <i>Pasteurellaceae</i>       | <i>Other</i>              | 3.262     | HP           | 0.028*  |
| Tenericutes    | <i>Mollicutes</i>          | <i>RF39</i>            |                              |                           | 2.569     | AP           | 0.021*  |

## f. HP vs. AP

| Phylum             | Class                      | Order                     | Family                     | Genus                 | Species            | LDA Score | Riched group | p-value |
|--------------------|----------------------------|---------------------------|----------------------------|-----------------------|--------------------|-----------|--------------|---------|
| Firmicutes         | <i>Erysipelotrichi</i>     | <i>Erysipelotrichales</i> | <i>Erysipelotrichaceae</i> | <i>Other</i>          |                    | 2.490     | AP           | 0.034*  |
|                    | <i>Clostridia</i>          | <i>Clostridiales</i>      | <i>Clostridiaceae</i>      | <i>Clostridium</i>    | <i>butyricum</i>   | 1.580     | HP           | 0.005** |
|                    | <i>Clostridia</i>          | <i>Clostridiales</i>      | <i>Clostridiaceae</i>      | <i>Clostridium</i>    | <i>perfringens</i> | 3.553     | AP           | 0.045*  |
| Bacteroidetes      |                            |                           |                            |                       |                    | 5.897     | HP           | 0.005** |
|                    | <i>Bacteroidia</i>         |                           |                            |                       |                    | 5.896     | HP           | 0.005** |
|                    | <i>Flavobacteriia</i>      |                           |                            |                       |                    | 2.111     | HP           | 0.005** |
|                    | <i>Flavobacteriia</i>      | <i>Flavobacteriales</i>   |                            |                       |                    | 2.111     | HP           | 0.005** |
|                    | <i>Bacteroidia</i>         | <i>Bacteroidales</i>      | <i>RF16</i>                |                       |                    | 2.350     | HP           | 0.043*  |
|                    | <i>Flavobacteriia</i>      | <i>Flavobacteriales</i>   | <i>Cryomorphaceae</i>      |                       |                    | 1.774     | HP           | 0.005** |
|                    | <i>Flavobacteriia</i>      | <i>Flavobacteriales</i>   | <i>Flavobacteriaceae</i>   |                       |                    | 1.844     | HP           | 0.005** |
|                    | <i>Bacteroidia</i>         | <i>Bacteroidales</i>      | <i>Bacteroidaceae</i>      |                       |                    | 5.741     | HP           | 0.012*  |
|                    | <i>Bacteroidia</i>         | <i>Bacteroidales</i>      | <i>Bacteroidaceae</i>      | <i>Bacteroides</i>    |                    | 5.213     | HP           | 0.009** |
|                    | <i>Flavobacteriia</i>      | <i>Flavobacteriales</i>   | <i>Cryomorphaceae</i>      | <i>Fluviicola</i>     |                    | 1.774     | HP           | 0.005** |
|                    | <i>Flavobacteriia</i>      | <i>Flavobacteriales</i>   | <i>Flavobacteriaceae</i>   | <i>Flavobacterium</i> |                    | 1.844     | HP           | 0.005** |
|                    | <i>Bacteroidia</i>         | <i>Bacteroidales</i>      | <i>Bacteroidaceae</i>      | <i>Bacteroides</i>    | <i>caccae</i>      | 3.149     | HP           | 0.034*  |
|                    | <i>Bacteroidia</i>         | <i>Bacteroidales</i>      | <i>Bacteroidaceae</i>      | <i>Bacteroides</i>    | <i>uniformis</i>   | 4.188     | HP           | 0.016*  |
| <i>Bacteroidia</i> | <i>Bacteroidales</i>       | <i>Bacteroidaceae</i>     | <i>Bacteroides</i>         | <i>ovatus</i>         | 4.873              | HP        | 0.005**      |         |
| Proteobacteria     | <i>Alphaproteobacteria</i> | <i>Rhodobacterales</i>    |                            |                       |                    | 2.422     | HP           | 0.005** |
|                    | <i>Alphaproteobacteria</i> | <i>Rhodobacterales</i>    | <i>Rhodobacteraceae</i>    |                       |                    | 2.422     | HP           | 0.005** |
|                    | <i>Betaproteobacteria</i>  | <i>Burkholderiales</i>    | <i>Comamonadaceae</i>      | <i>Leptothrix</i>     |                    | 1.936     | HP           | 0.005** |

|                |                            |                        |                         |                    |                    |       |    |         |
|----------------|----------------------------|------------------------|-------------------------|--------------------|--------------------|-------|----|---------|
|                | <i>Alphaproteobacteria</i> | <i>Rhodobacterales</i> | <i>Rhodobacteraceae</i> | <i>Rhodobacter</i> |                    | 2.422 | HP | 0.005** |
|                | <i>Gammaproteobacteria</i> | <i>Pseudomonadales</i> | <i>Pseudomonadaceae</i> | <i>Pseudomonas</i> | <i>viridiflava</i> | 1.636 | HP | 0.005** |
| Actinobacteria | <i>Actinobacteria</i>      | <i>Actinomycetales</i> | <i>Micrococcaceae</i>   | <i>Rothia</i>      |                    | 2.258 | HP | 0.041*  |
|                | <i>Actinobacteria</i>      | <i>Actinomycetales</i> | <i>Micrococcaceae</i>   | <i>Rothia</i>      | <i>nasimurium</i>  | 2.258 | HP | 0.041*  |

g. HP vs. DP

| Phylum        | Class                 | Order                   | Family                       | Genus                     | Species            | LDA Score | Riched group | p-value |         |
|---------------|-----------------------|-------------------------|------------------------------|---------------------------|--------------------|-----------|--------------|---------|---------|
|               |                       |                         |                              |                           |                    | 5.736     | DP           | 0.028*  |         |
|               | <i>Bacilli</i>        | <i>Lactobacillales</i>  | <i>Enterococcaceae</i>       |                           |                    | 3.287     | DP           | 0.034*  |         |
|               | <i>Clostridia</i>     | <i>Clostridiales</i>    | <i>Veillonellaceae</i>       |                           |                    | 4.846     | DP           | 0.016*  |         |
| Firmicutes    | <i>Bacilli</i>        | <i>Lactobacillales</i>  | <i>Enterococcaceae</i>       | <i>Enterococcus</i>       |                    | 3.209     | DP           | 0.034*  |         |
|               | <i>Clostridia</i>     | <i>Clostridiales</i>    | <i>Peptostreptococcaceae</i> | <i>Peptostreptococcus</i> |                    | 4.165     | DP           | 0.026*  |         |
|               | <i>Clostridia</i>     | <i>Clostridiales</i>    | <i>Lachnospiraceae</i>       | <i>Coprococcus</i>        | <i>Other</i>       | 1.811     | HP           | 0.041*  |         |
|               | <i>Clostridia</i>     | <i>Clostridiales</i>    | <i>Clostridiaceae</i>        | <i>Clostridium</i>        | <i>butyricum</i>   | 1.580     | HP           | 0.005** |         |
|               | <i>Clostridia</i>     | <i>Clostridiales</i>    | <i>Clostridiaceae</i>        | <i>Clostridium</i>        | <i>perfringens</i> | 4.199     | DP           | 0.035*  |         |
|               | <i>Bacilli</i>        | <i>Lactobacillales</i>  | <i>Lactobacillaceae</i>      | <i>Lactobacillus</i>      | <i>vaginalis</i>   | 4.828     | DP           | 0.028*  |         |
|               |                       |                         |                              |                           |                    |           | 5.897        | HP      | 0.004** |
|               |                       | <i>Bacteroidia</i>      |                              |                           |                    |           | 5.896        | HP      | 0.004** |
| Bacteroidetes | <i>Bacteroidia</i>    | <i>Bacteroidales</i>    |                              |                           |                    | 3.713     | DP           | 0.007** |         |
|               | <i>Bacteroidia</i>    | <i>Bacteroidales</i>    | <i>Bacteroidales</i>         |                           |                    | 3.707     | HP           | 0.008** |         |
|               | <i>Bacteroidia</i>    | <i>Bacteroidales</i>    | <i>RF16</i>                  |                           |                    | 2.350     | HP           | 0.005** |         |
|               | <i>Flavobacteriia</i> | <i>Flavobacteriales</i> | <i>Flavobacteriaceae</i>     |                           |                    | 1.844     | HP           | 0.005** |         |
|               | <i>Flavobacteriia</i> | <i>Flavobacteriales</i> | <i>Cryomorphaceae</i>        |                           |                    | 1.774     | HP           | 0.005** |         |
|               | <i>Bacteroidia</i>    | <i>Bacteroidales</i>    | <i>Bacteroidaceae</i>        |                           |                    | 5.741     | HP           | 0.036*  |         |

|                |                            |                          |                           |                         |                  |       |    |         |
|----------------|----------------------------|--------------------------|---------------------------|-------------------------|------------------|-------|----|---------|
|                | <i>Flavobacteriia</i>      | <i>Flavobacteriales</i>  | <i>Flavobacteriaceae</i>  | <i>Flavobacterium</i>   |                  | 1.844 | HP | 0.005** |
|                | <i>Flavobacteriia</i>      | <i>Flavobacteriales</i>  | <i>Cryomorphaceae</i>     | <i>Fluviicola</i>       |                  | 1.774 | HP | 0.005** |
|                | <i>Bacteroidia</i>         | <i>Bacteroidales</i>     | <i>Paraprevotellaceae</i> | <i>CF231</i>            |                  | 2.807 | HP | 0.009** |
|                | <i>Bacteroidia</i>         | <i>Bacteroidales</i>     | <i>Bacteroidaceae</i>     | <i>Bacteroides</i>      |                  | 5.213 | HP | 0.035*  |
|                | <i>Bacteroidia</i>         | <i>Bacteroidales</i>     | <i>Odoribacteraceae</i>   | <i>Odoribacter</i>      |                  | 3.172 | HP | 0.021*  |
|                | <i>Bacteroidia</i>         | <i>Bacteroidales</i>     | <i>Prevotellaceae</i>     | <i>Prevotella</i>       |                  | 3.831 | HP | 0.020*  |
|                | <i>Bacteroidia</i>         | <i>Bacteroidales</i>     | <i>Porphyromonadaceae</i> | <i>Porphyromonas</i>    |                  | 3.284 | DP | 0.022*  |
|                | <i>Bacteroidia</i>         | <i>Bacteroidales</i>     | <i>Prevotellaceae</i>     | <i>Prevotella</i>       | <i>Other</i>     | 3.690 | HP | 0.017*  |
|                | <i>Bacteroidia</i>         | <i>Bacteroidales</i>     | <i>Bacteroidaceae</i>     | <i>Bacteroides</i>      | <i>uniformis</i> | 4.188 | HP | 0.012*  |
|                | <i>Bacteroidia</i>         | <i>Bacteroidales</i>     | <i>Prevotellaceae</i>     | <i>Prevotella</i>       | <i>stercorea</i> | 4.962 | HP | 0.012*  |
|                | <i>Bacteroidia</i>         | <i>Bacteroidales</i>     | <i>Bacteroidaceae</i>     | <i>Bacteroides</i>      | <i>Other</i>     | 5.277 | HP | 0.045*  |
|                | <i>Bacteroidia</i>         | <i>Bacteroidales</i>     | <i>Prevotellaceae</i>     | <i>Prevotella</i>       | <i>copri</i>     | 2.691 | HP | 0.039*  |
|                | <i>Bacteroidia</i>         | <i>Bacteroidales</i>     | <i>Bacteroidaceae</i>     | <i>Bacteroides</i>      | <i>ovatus</i>    | 4.873 | HP | 0.003** |
|                | <i>Bacteroidia</i>         | <i>Bacteroidales</i>     | <i>Porphyromonadaceae</i> | <i>Parabacteroides</i>  | <i>Other</i>     | 3.241 | HP | 0.002** |
|                | <i>Bacteroidia</i>         | <i>Bacteroidales</i>     | <i>Bacteroidaceae</i>     | <i>Bacteroides</i>      | <i>caccae</i>    | 3.149 | HP | 0.001** |
|                | <i>Alphaproteobacteria</i> |                          |                           |                         |                  | 2.422 | HP | 0.005** |
|                | <i>Gammaproteobacteria</i> | <i>Xanthomonadales</i>   |                           |                         |                  | 1.774 | HP | 0.005** |
|                | <i>Alphaproteobacteria</i> | <i>Rhodobacterales</i>   |                           |                         |                  | 2.422 | HP | 0.005** |
|                | <i>Gammaproteobacteria</i> | <i>Enterobacteriales</i> |                           |                         |                  | 5.023 | DP | 0.036*  |
|                | <i>Alphaproteobacteria</i> | <i>Rhodobacterales</i>   | <i>Rhodobacteraceae</i>   |                         |                  | 2.422 | HP | 0.005** |
| Proteobacteria | <i>Betaproteobacteria</i>  | <i>Burkholderiales</i>   | <i>Comamonadaceae</i>     |                         |                  | 2.471 | HP | 0.005** |
|                | <i>Gammaproteobacteria</i> | <i>Enterobacteriales</i> | <i>Enterobacteriaceae</i> |                         |                  | 4.305 | DP | 0.036*  |
|                | <i>Gammaproteobacteria</i> | <i>Xanthomonadales</i>   | <i>Xanthomonadaceae</i>   |                         |                  | 1.774 | HP | 0.005** |
|                | <i>Betaproteobacteria</i>  | <i>Burkholderiales</i>   | <i>Comamonadaceae</i>     | <i>Other</i>            |                  | 1.639 | HP | 0.005** |
|                | <i>Betaproteobacteria</i>  | <i>Burkholderiales</i>   | <i>Comamonadaceae</i>     | <i>Delftia</i>          |                  | 1.636 | HP | 0.005** |
|                | <i>Gammaproteobacteria</i> | <i>Xanthomonadales</i>   | <i>Xanthomonadaceae</i>   | <i>Stenotrophomonas</i> |                  | 1.774 | HP | 0.005** |

|                |                            |                          |                             |                          |                    |       |    |         |
|----------------|----------------------------|--------------------------|-----------------------------|--------------------------|--------------------|-------|----|---------|
|                | <i>Alphaproteobacteria</i> | <i>Rhodobacterales</i>   | <i>Rhodobacteraceae</i>     | <i>Rhodobacter</i>       |                    | 2.422 | HP | 0.005** |
|                | <i>Betaproteobacteria</i>  | <i>Burkholderiales</i>   | <i>Comamonadaceae</i>       | <i>Comamonas</i>         |                    | 1.809 | HP | 0.005** |
|                | <i>Betaproteobacteria</i>  | <i>Burkholderiales</i>   | <i>Comamonadaceae</i>       | <i>Leptothrix</i>        |                    | 1.936 | HP | 0.005** |
|                | <i>Gammaproteobacteria</i> | <i>Enterobacteriales</i> | <i>Enterobacteriaceae</i>   | <i>Other</i>             |                    | 4.924 | DP | 0.036*  |
|                | <i>Gammaproteobacteria</i> | <i>Pseudomonadales</i>   | <i>Pseudomonadaceae</i>     | <i>Pseudomonas</i>       | <i>viridiflava</i> | 1.636 | HP | 0.005** |
| Actinobacteria | <i>Actinobacteria</i>      | <i>Actinomycetales</i>   | <i>Propionibacteriaceae</i> |                          |                    | 1.685 | HP | 0.005** |
|                | <i>Actinobacteria</i>      | <i>Actinomycetales</i>   | <i>Propionibacteriaceae</i> | <i>Propionibacterium</i> |                    | 1.685 | HP | 0.005** |
|                | <i>Actinobacteria</i>      | <i>Actinomycetales</i>   | <i>Propionibacteriaceae</i> | <i>Propionibacterium</i> | <i>acnes</i>       | 1.685 | HP | 0.005** |

#### h. AP vs. DP

| Phylum        | Class                  | Order                     | Family                     | Genus                        | Species          | LDA Score | Riched group | p-value |
|---------------|------------------------|---------------------------|----------------------------|------------------------------|------------------|-----------|--------------|---------|
| Firmicutes    | <i>Clostridia</i>      | <i>Clostridiales</i>      |                            |                              |                  | 4.657     | AP           | 0.021*  |
|               | <i>Clostridia</i>      | <i>Clostridiales</i>      | <i>Veillonellaceae</i>     |                              |                  | 4.846     | DP           | 0.044*  |
|               | <i>Erysipelotrichi</i> | <i>Erysipelotrichales</i> | <i>Erysipelotrichaceae</i> |                              |                  | 3.390     | DP           | 0.041*  |
|               | <i>Clostridia</i>      | <i>Clostridiales</i>      | <i>Ruminococcaceae</i>     | <i>Other</i>                 |                  | 4.286     | AP           | 0.036*  |
|               | <i>Bacilli</i>         | <i>Bacillales</i>         | <i>Bacillales</i>          | <i>Other</i>                 |                  | 2.070     | AP           | 0.035*  |
|               | <i>Clostridia</i>      | <i>Clostridiales</i>      | <i>Clostridiaceae</i>      | <i>SMB53</i>                 |                  | 3.997     | AP           | 0.004** |
|               | <i>Clostridia</i>      | <i>Clostridiales</i>      | <i>Veillonellaceae</i>     | <i>Phascolarctobacterium</i> |                  | 3.015     | AP           | 0.038*  |
|               | <i>Clostridia</i>      | <i>Clostridiales</i>      | <i>Veillonellaceae</i>     | <i>Veillonella</i>           | <i>Other</i>     | 4.826     | DP           | 0.040*  |
|               | <i>Bacilli</i>         | <i>Lactobacillales</i>    | <i>Lactobacillaceae</i>    | <i>Lactobacillus</i>         | <i>mucosae</i>   | 3.814     | DP           | 0.028*  |
|               | <i>Bacilli</i>         | <i>Lactobacillales</i>    | <i>Lactobacillaceae</i>    | <i>Lactobacillus</i>         | <i>vaginalis</i> | 4.828     | DP           | 0.012*  |
| Bacteroidetes | <i>Bacteroidia</i>     | <i>Bacteroidales</i>      |                            |                              |                  | 4.038     | AP           | 0.042*  |
|               | <i>Bacteroidia</i>     | <i>Bacteroidales</i>      | <i>Other</i>               |                              |                  | 3.615     | AP           | 0.021*  |
|               | <i>Bacteroidia</i>     | <i>Bacteroidales</i>      | <i>Paraprevotellaceae</i>  |                              |                  | 2.086     | AP           | 0.041*  |

|                |                            |                          |                           |                        |              |       |         |         |
|----------------|----------------------------|--------------------------|---------------------------|------------------------|--------------|-------|---------|---------|
|                | <i>Bacteroidia</i>         | <i>Bacteroidales</i>     | <i>Prevotellaceae</i>     | <i>Prevotella</i>      | 4.084        | AP    | 0.021*  |         |
|                | <i>Bacteroidia</i>         | <i>Bacteroidales</i>     | <i>Odoribacteraceae</i>   | <i>Odoribacter</i>     | 3.003        | AP    | 0.020*  |         |
|                | <i>Bacteroidia</i>         | <i>Bacteroidales</i>     | <i>Porphyromonadaceae</i> | <i>Porphyromonas</i>   | 3.284        | DP    | 0.010*  |         |
|                | <i>Bacteroidia</i>         | <i>Bacteroidales</i>     | <i>Prevotellaceae</i>     | <i>Prevotella</i>      | <i>copri</i> | 3.136 | AP      | 0.033*  |
|                | <i>Bacteroidia</i>         | <i>Bacteroidales</i>     | <i>Porphyromonadaceae</i> | <i>Parabacteroides</i> | <i>Other</i> | 2.280 | AP      | 0.047*  |
|                | <i>Bacteroidia</i>         | <i>Bacteroidales</i>     | <i>Prevotellaceae</i>     | <i>Prevotella</i>      | <i>Other</i> | 3.249 | AP      | 0.020*  |
|                | <i>Betaproteobacteria</i>  |                          |                           |                        |              | 4.424 | AP      | 0.008** |
| Proteobacteria | <i>Betaproteobacteria</i>  | <i>Burkholderiales</i>   |                           |                        | 4.421        | AP    | 0.007** |         |
|                | <i>Gammaproteobacteria</i> | <i>Pasteurellales</i>    | <i>Pasteurellaceae</i>    | <i>Other</i>           | 3.253        | DP    | 0.008** |         |
|                | <i>Mollicutes</i>          |                          |                           |                        |              | 2.863 | AP      | 0.032*  |
| Tenericutes    | <i>Mollicutes</i>          | <i>RF39</i>              |                           |                        | 2.569        | AP    | 0.007** |         |
|                | <i>Mollicutes</i>          | <i>Anaeroplasmatales</i> |                           |                        | 2.536        | AP    | 0.044*  |         |





**Figure S2**

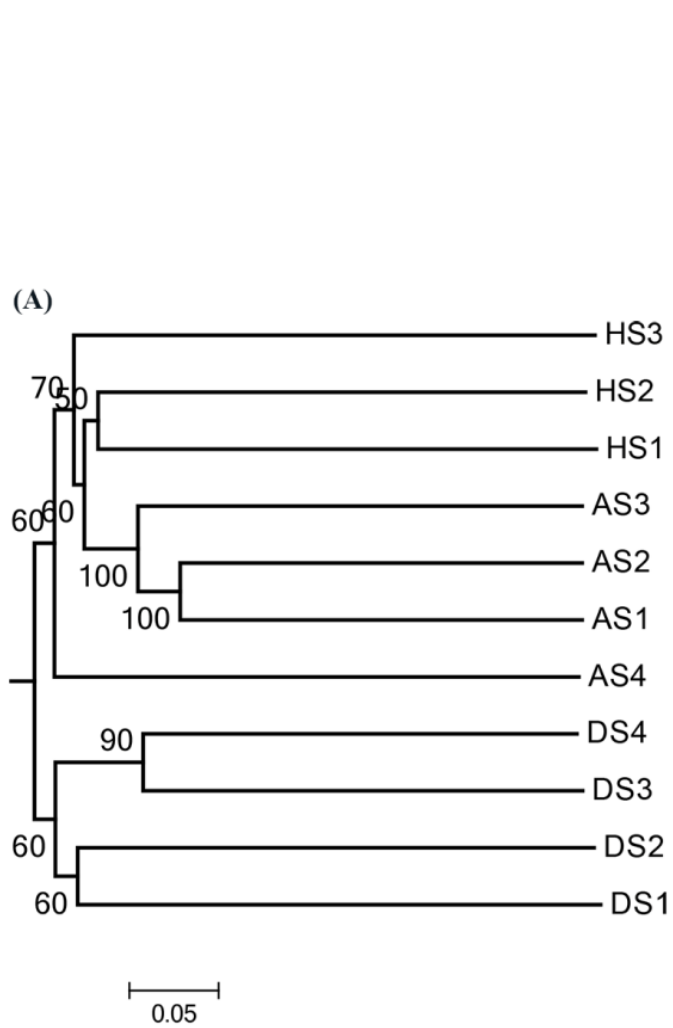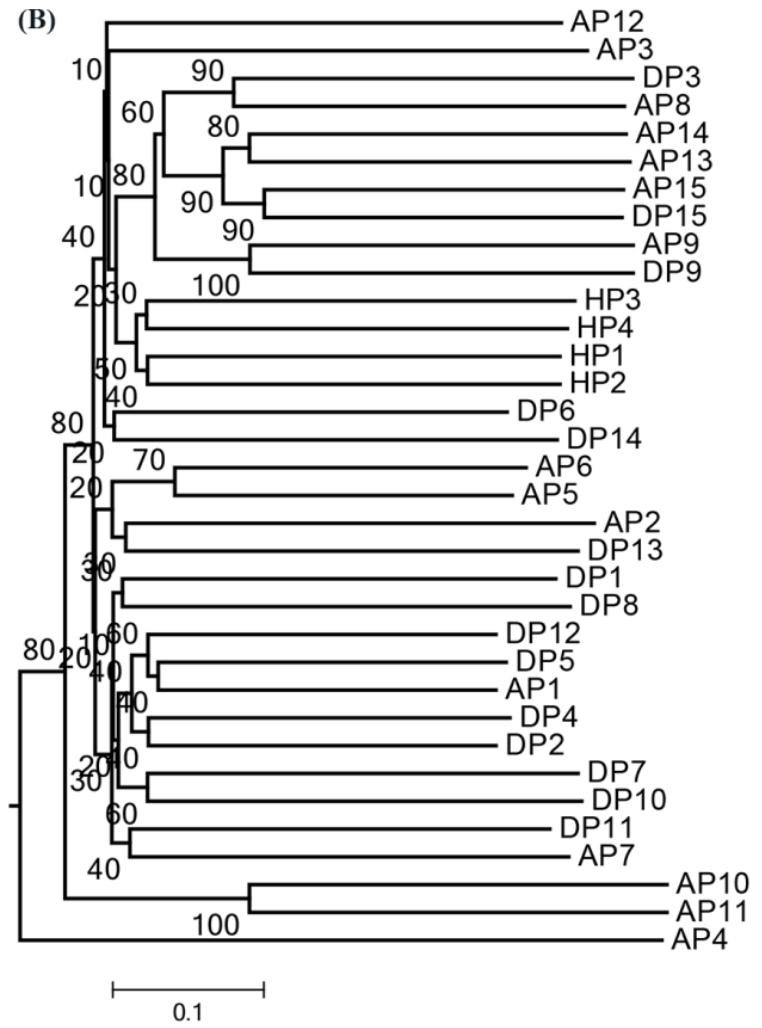

# Figure S3

A

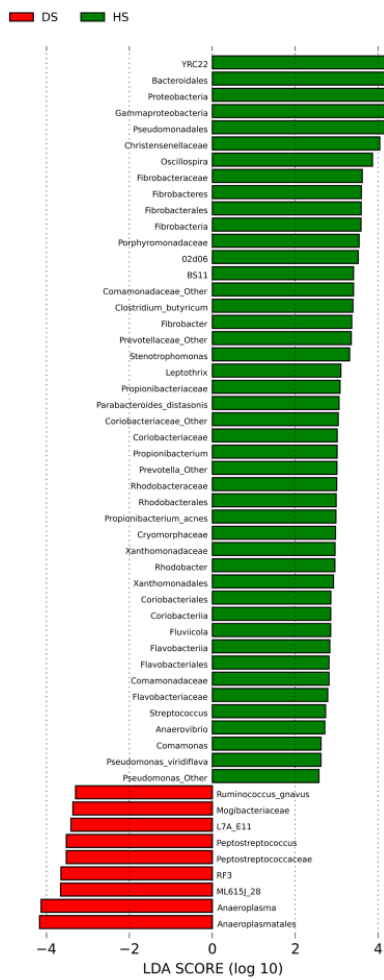

B

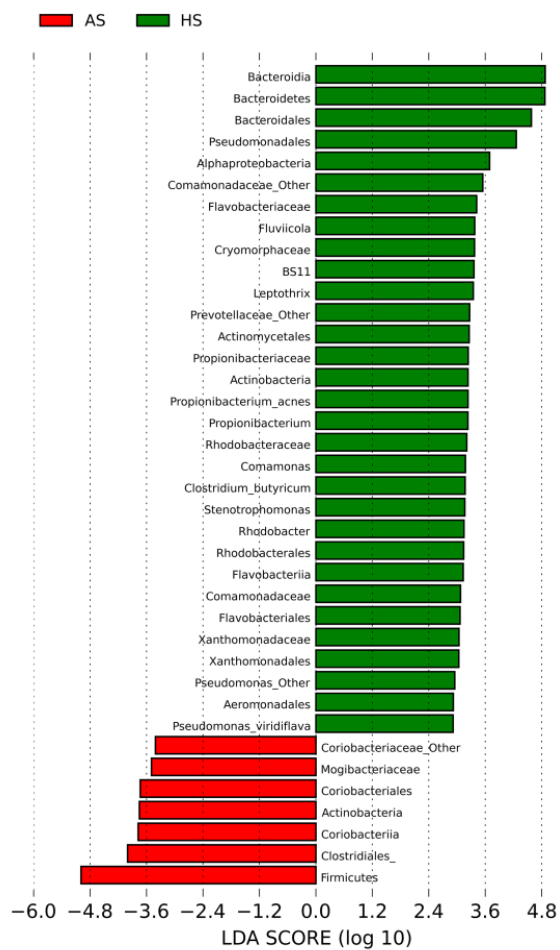

C

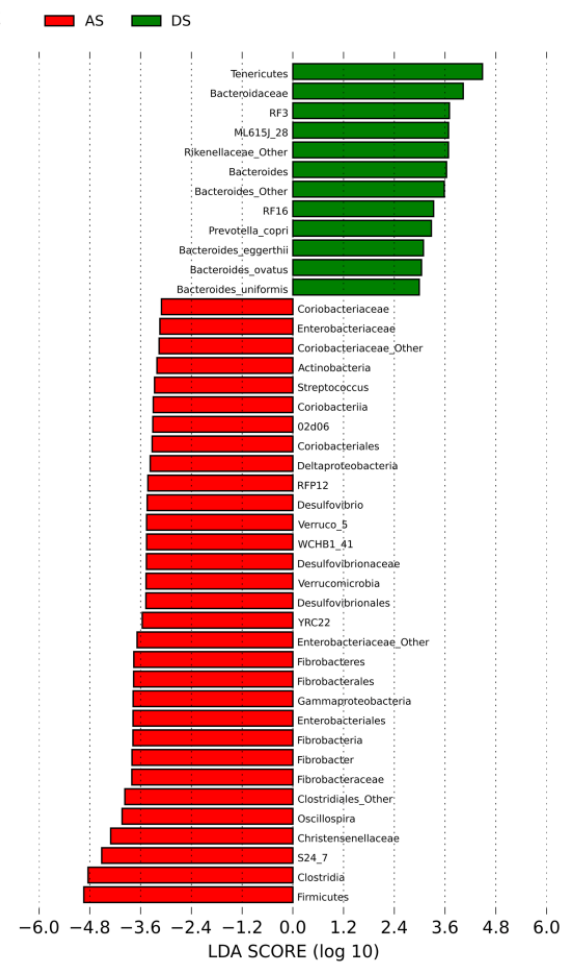

# Figure S4

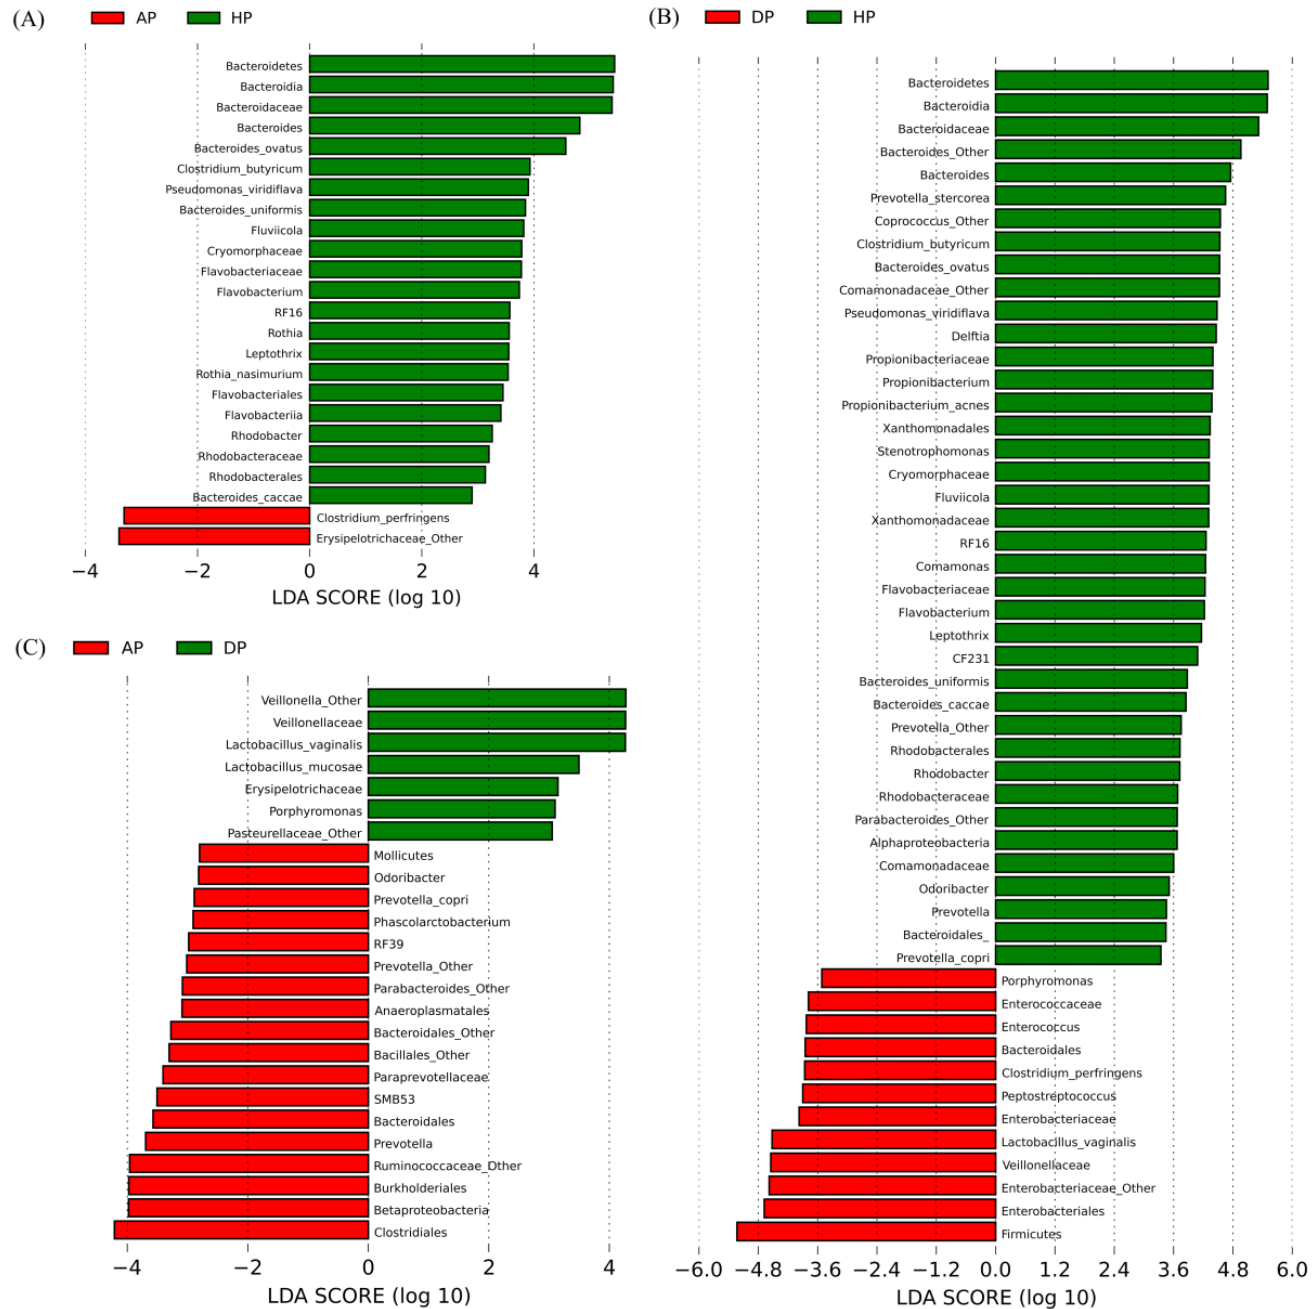

Supplement: 41598_2017_17830_MOESM1_ESM.pdf [file 41598_2017_17830_MOESM1_ESM.pdf]
